# Supplementary material for: CRISPR/Cas9-mediated heterozygous knockout of the autism gene CHD8 and characterization of its transcriptional networks in cerebral organoids derived from iPS cells
Source: PubMed Central journal article supplement (PMC5357816; doi:10.1186/s13229-017-0124-1), 2017-03-20

A. GABA/MAP2/DAPI

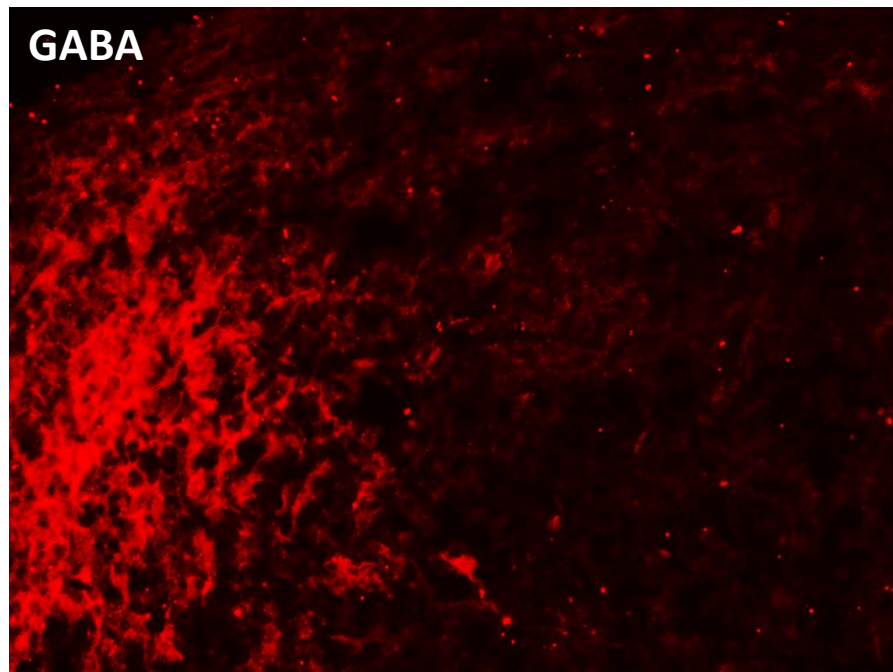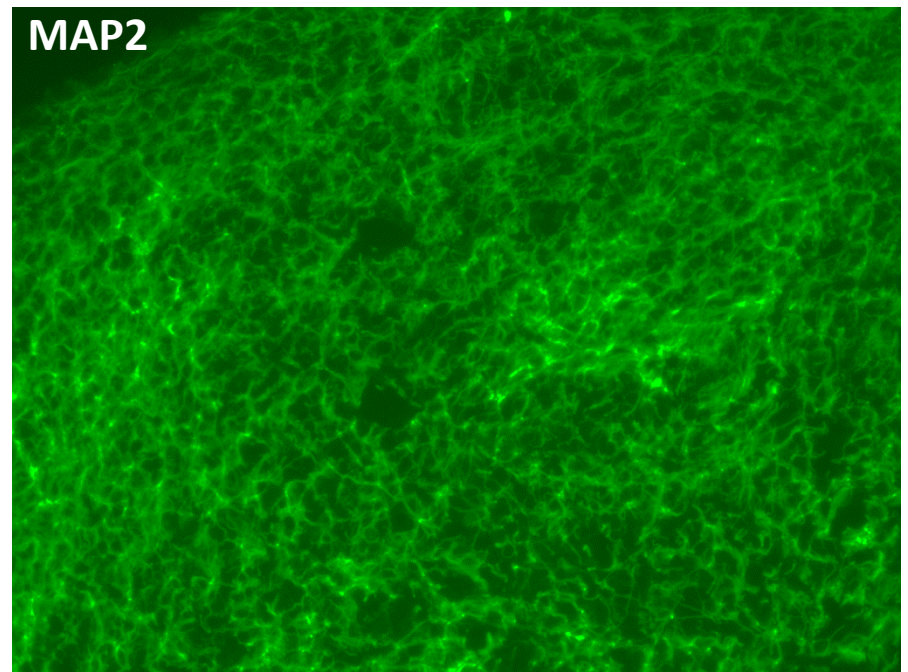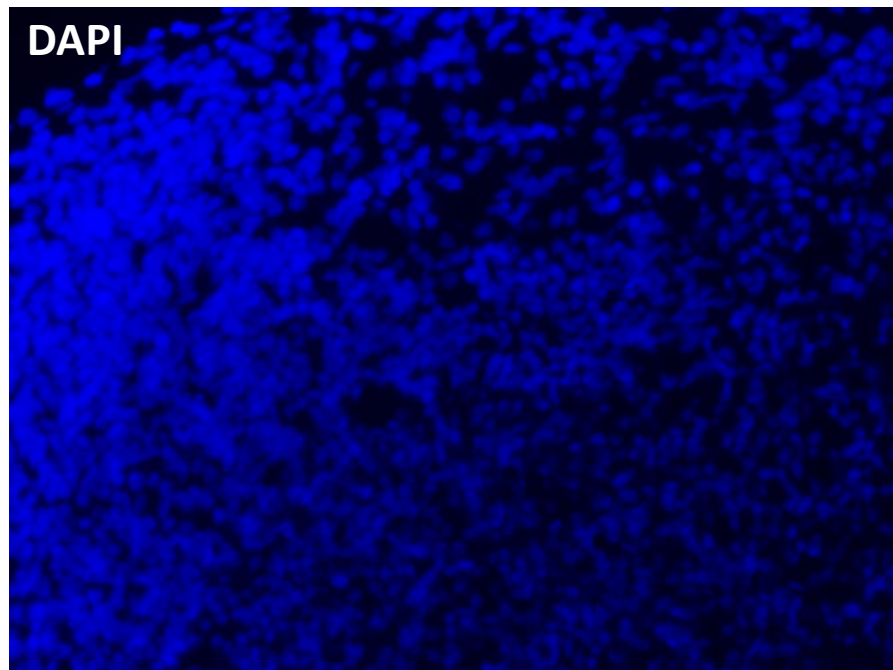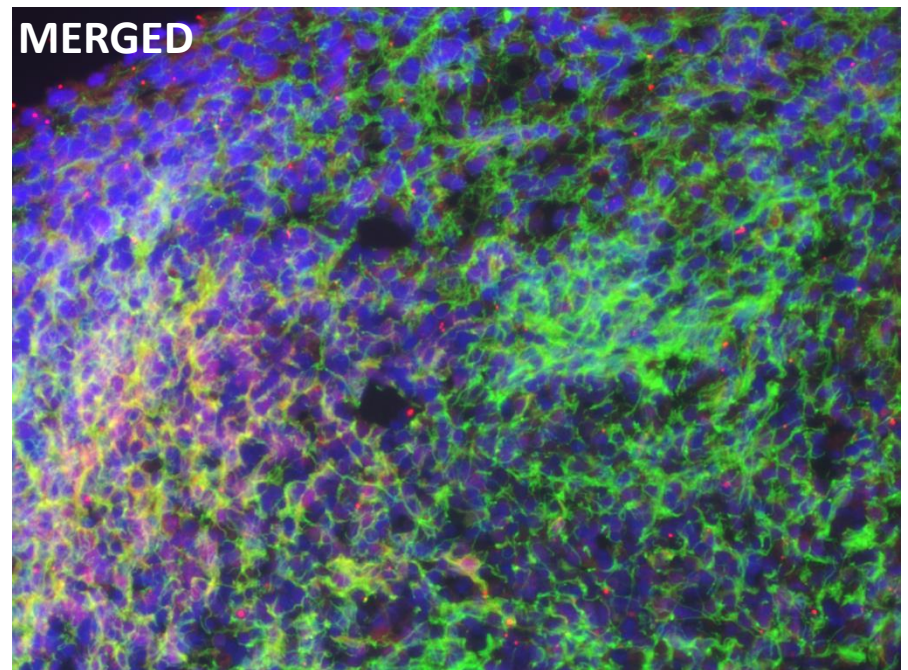



**B. GABA/vGLUT/DAPI**

**GABA**

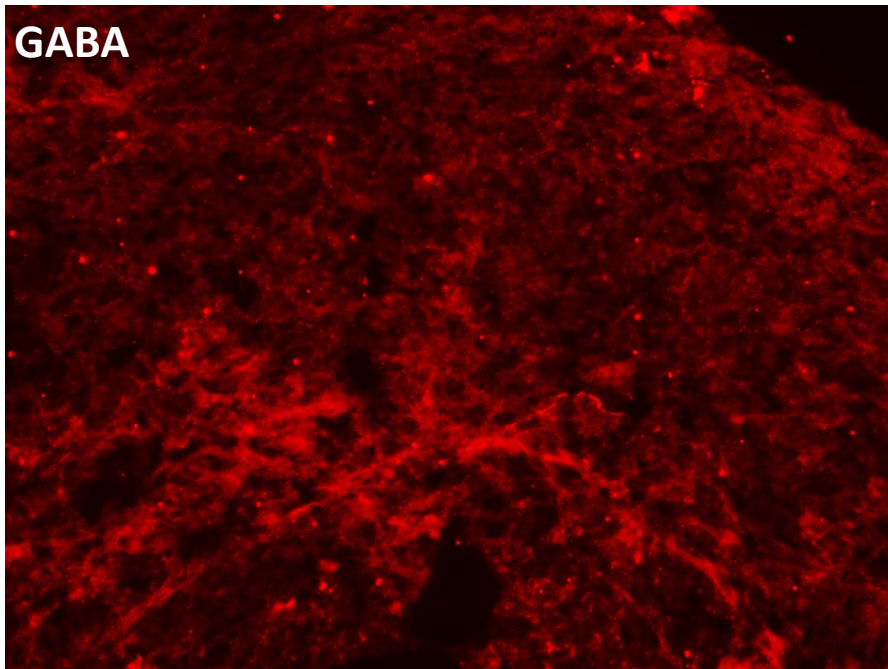

**vGLUT**

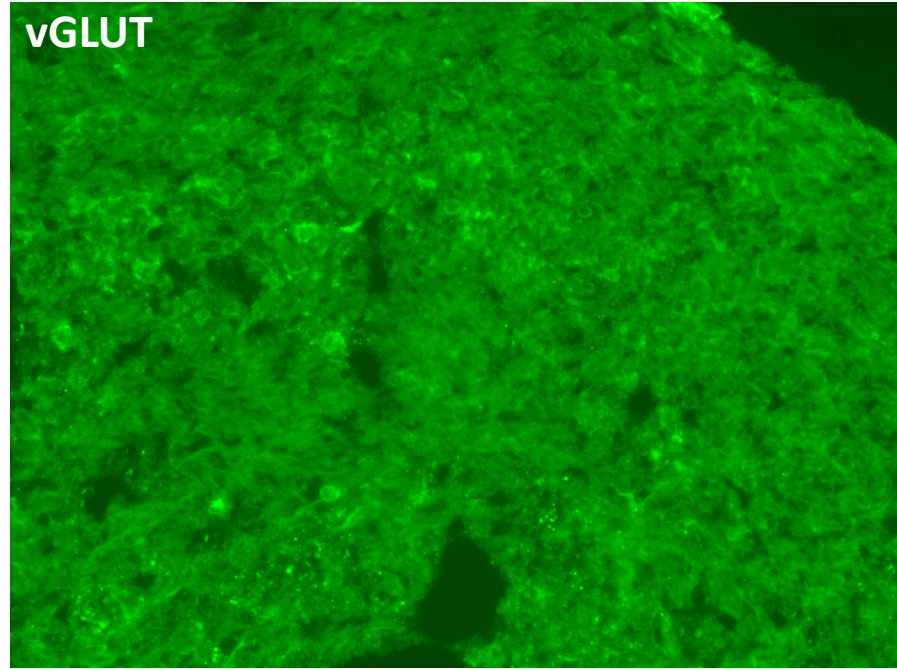

**DAPI**

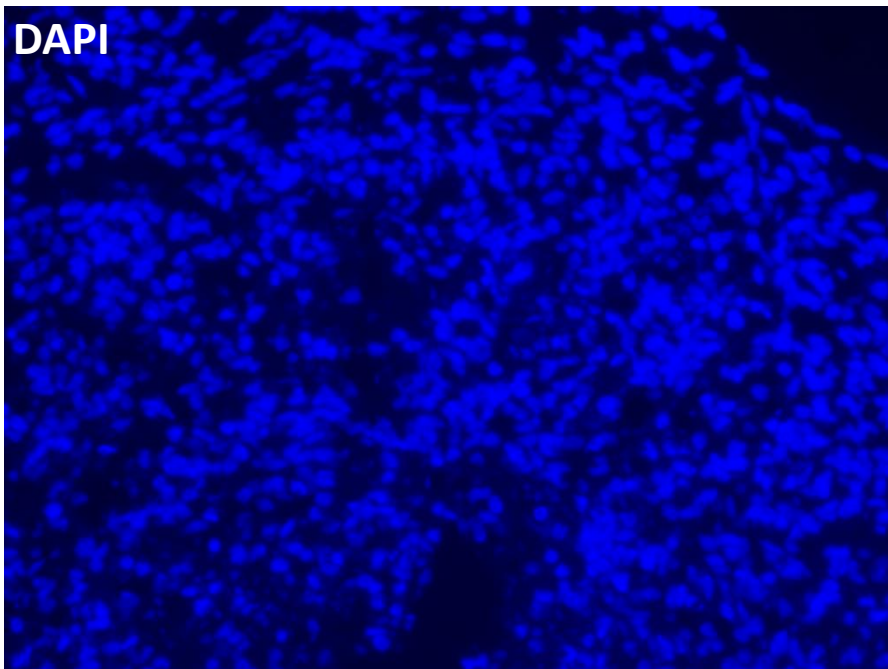

**MERGED**

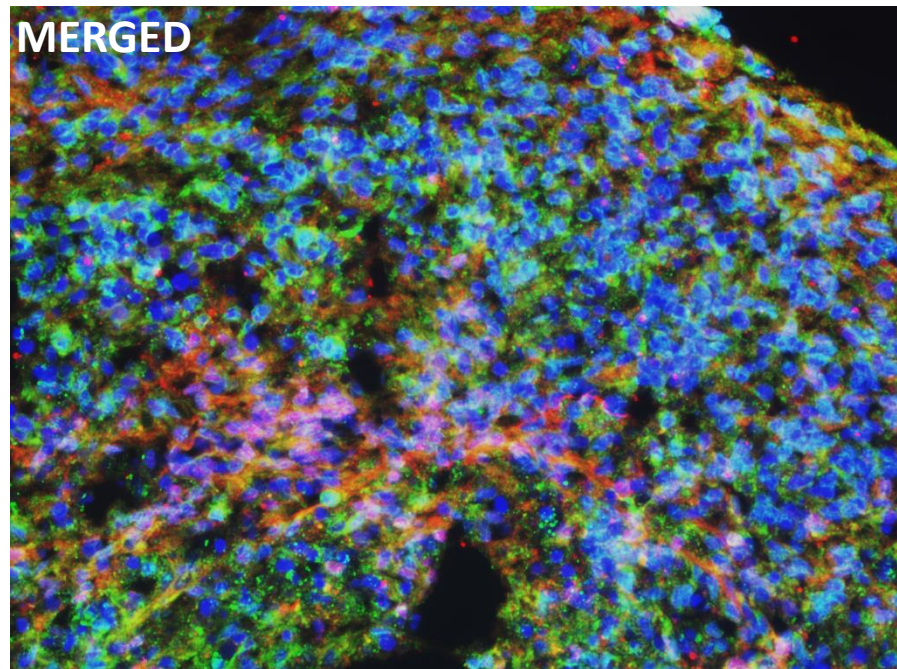



C. CHD8/Tuj1

Control

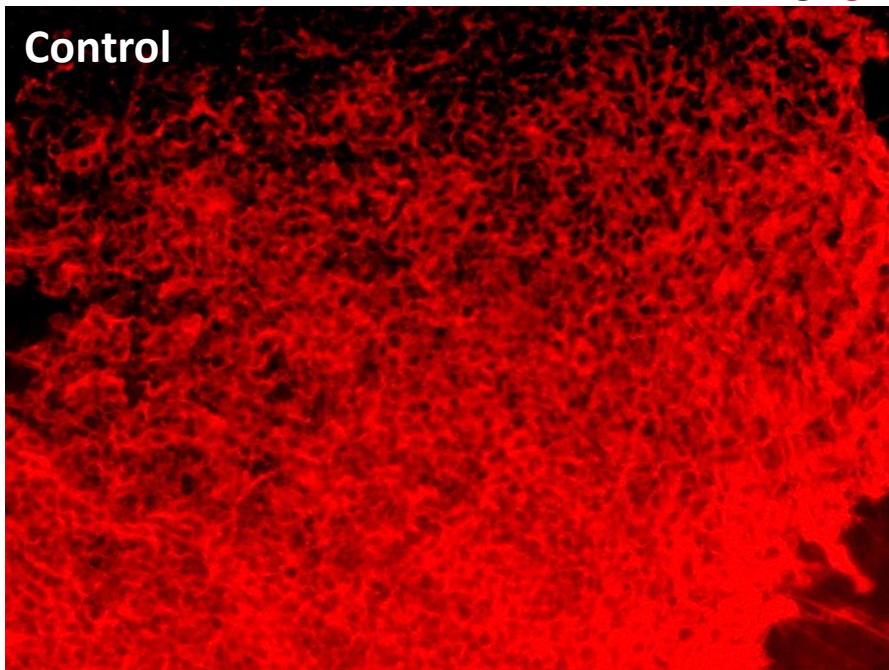

Control

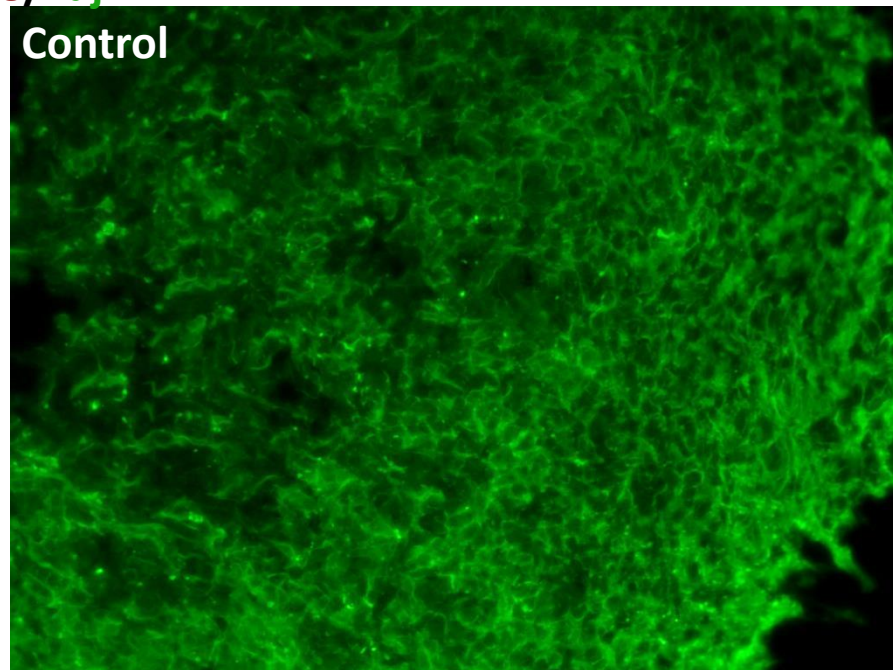

CHD8+/-

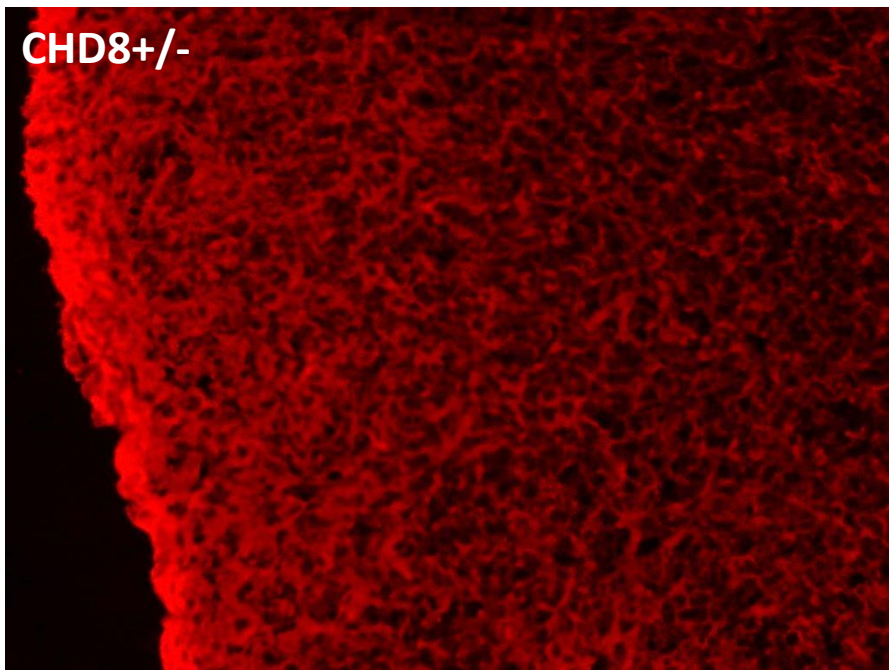

CHD8+/-

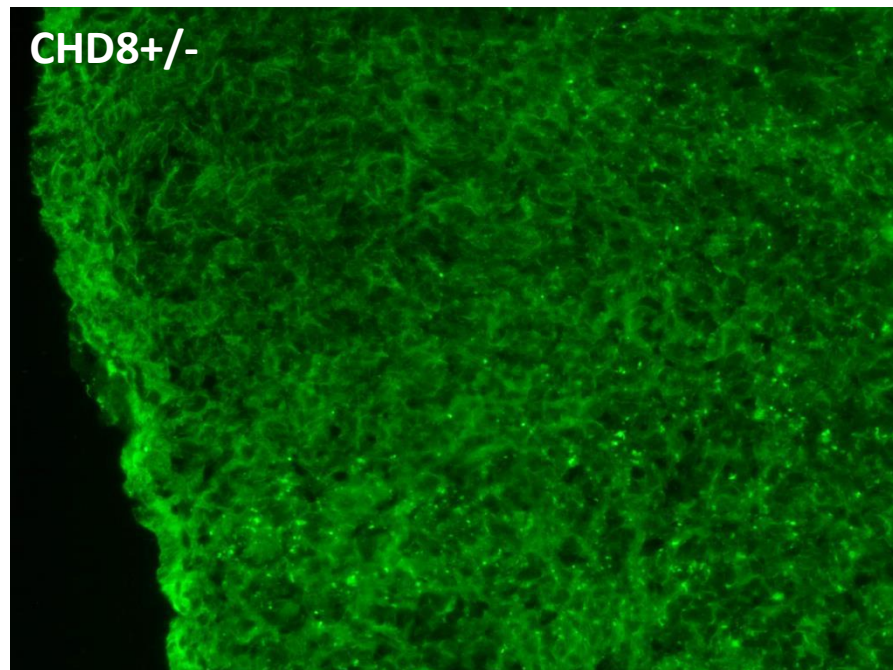

Supplement: 13229_2017_124_MOESM2_ESM.pdf [file 13229_2017_124_MOESM2_ESM.pdf]
