# Supplementary material for: CRISPR/Cas9-mediated heterozygous knockout of the autism gene CHD8 and characterization of its transcriptional networks in cerebral organoids derived from iPS cells
Source: Mol Autism. 2017 Mar 20;8:11. doi: 10.1186/s13229-017-0124-1 (PMC5357816; doi:10.1186/s13229-017-0124-1)
Supplement: Additional file 5: Table S3. — Enriched gene ontology (GO) terms for DEGs: Sheet 1, upregulated DEGs; Sheet 2, downregulated DEGs; Sheet 3, IPA canonical pathways. (XLSX 62 kb) [file 13229_2017_124_MOESM5_ESM.xlsx]

## Sheet: GO_upregulated
Category	Term	Count	%	PValue	Genes	List Total	Pop Hits	Pop Total	Fold Enrichment	Benjamini
GOTERM_BP_FAT	GO:0007399~nervous system development	99	34.9823	5.28366e-20	MEF2C, KCNC2, PLXNA4, GABRB2, S1PR1, ROBO2, PDGFC, LGI1, ASPM, LRRC7, CDH23, ISLR2, MATN2, EFNB1, EFNB2, EOMES, FRY, HES1, SLITRK4, RELN, WNT5B, ARHGEF28, SOX2, CLU, SOX5, SOX6, TIMP2, SOX9, SOX8, ARX, CRB1, ITGAV, PLXND1, TCF4, GNRH1, CPNE6, NEUROG2, SERPINI1, GAS7, FEZF1, NOTCH2, FEZF2, MYO10, EPHA7, DLX1, NPY, PENK, SFRP1, SALL1, HDAC9, FABP7, NRP2, OPCML, PAX6, KCNQ3, SLC1A3, CNTNAP2, SEMA3A,…	236	1527	9052	2.48673	2.18215e-16
GOTERM_BP_FAT	GO:0022008~neurogenesis	80	28.2686	1.22302e-18	MEF2C, NRP2, PLXNA4, OPCML, GABRB2, PAX6, SLC1A3, S1PR1, KCNQ3, CNTNAP2, ROBO2, SEMA3A, LGI1, ASPM, LRRC7, ISLR2, CDH23, MATN2, CDK1, EFNB1, EFNB2, EOMES, LEF1, COL25A1, FRY, HES1, PRKD1, EPB41L3, SLITRK4, EML1, NAB1, RELN, PRNP, WNT5B, TNC, ARHGEF28, APH1B, CLU, SOX2, SOX5, SOX6, SOX9, TIMP2, SOX8, ZBTB18, ARX, NPTX1, EZR, CRB1, FAT4, ITGAV, BCL11B, PCSK9, ETV1, PLXND1, TCF4, PHLDA1, CAP2, GNRH1…	236	1094	9052	2.80482	2.52553e-15
GOTERM_BP_FAT	GO:0048699~generation of neurons	76	26.8551	1.95149e-17	MEF2C, NRP2, PLXNA4, OPCML, GABRB2, PAX6, SLC1A3, S1PR1, KCNQ3, CNTNAP2, ROBO2, SEMA3A, LGI1, ASPM, LRRC7, ISLR2, CDH23, MATN2, CDK1, EFNB1, EFNB2, EOMES, LEF1, COL25A1, FRY, HES1, PRKD1, EPB41L3, SLITRK4, EML1, RELN, PRNP, WNT5B, TNC, ARHGEF28, APH1B, CLU, SOX2, SOX5, SOX9, TIMP2, SOX8, ZBTB18, ARX, NPTX1, EZR, CRB1, FAT4, ITGAV, BCL11B, PCSK9, ETV1, PLXND1, TCF4, PHLDA1, CAP2, GNRH1, PTPRZ1, CP…	236	1046	9052	2.78686	2.68655e-14
GOTERM_BP_FAT	GO:0030182~neuron differentiation	72	25.4417	8.43202e-17	MEF2C, NRP2, PLXNA4, OPCML, GABRB2, PAX6, SLC1A3, S1PR1, KCNQ3, CNTNAP2, ROBO2, SEMA3A, LGI1, ASPM, LRRC7, ISLR2, CDH23, MATN2, EFNB1, EFNB2, EOMES, LEF1, COL25A1, FRY, HES1, PRKD1, EPB41L3, SLITRK4, RELN, PRNP, WNT5B, TNC, ARHGEF28, APH1B, CLU, SOX2, SOX5, SOX9, TIMP2, SOX8, ZBTB18, ARX, NPTX1, EZR, CRB1, FAT4, ITGAV, BCL11B, PCSK9, ETV1, TCF4, PLXND1, PHLDA1, CAP2, PTPRZ1, CPNE6, NEUROG2, GAS7,…	236	975	9052	2.83244	1.14575e-13
GOTERM_BP_FAT	GO:0048468~cell development	84	29.682	2.27671e-15	MEF2C, NRP2, PLXNA4, OPCML, GABRB2, PAX6, FRMD6, SLC1A3, KCNQ3, CNTNAP2, ROBO2, SEMA3A, LGI1, COL11A1, ASPM, LRRC7, ISLR2, CDH23, MATN2, CDK1, EFNB1, EFNB2, EOMES, LEF1, COL25A1, HMGA2, FRY, HES1, PRKD1, EPB41L3, SLITRK4, RELN, PRNP, NPPA, ACVR1, SHROOM3, WNT5B, TNC, ARHGEF28, APH1B, CLU, SOX2, SOX5, SOX6, SOX9, TIMP2, SOX8, ZBTB18, ARX, NPTX1, EZR, CRB1, FAT4, ITGAV, BCL11B, ETV1, PLXND1, TCF4, …	236	1344	9052	2.39725	1.92579e-12
GOTERM_BP_FAT	GO:0045165~cell fate commitment	24	8.48057	3.71685e-15	MEF2C, WNT5B, SOX2, PAX6, EOMES, SOX5, NEUROG2, GAS1, SOX6, SOX9, SOX8, ARX, HES1, TENM4, NOTCH2, FEZF2, DLX1, SFRP1, BCL11B, CDON, TRPS1, SALL1, NEUROD1, ACVR1	236	109	9052	8.44534	2.52187e-12
GOTERM_BP_FAT	GO:0030900~forebrain development	32	11.3074	4.21057e-14	KCNC2, PLXNA4, SOX2, PAX6, ZBTB18, ARX, FAT4, BCL11B, CNTNAP2, ROBO2, SEMA3A, PLCB1, ASPM, PHLDA1, PTPRZ1, OTX1, PGAP1, EOMES, LEF1, NEUROG2, FEZF1, HES1, FEZF2, DLX1, NPY, CDON, SALL1, NEUROD1, RELN, FABP7, NEUROD6, NFIB	236	234	9052	5.24526	2.48257e-11
GOTERM_BP_FAT	GO:0021537~telencephalon development	26	9.18728	4.40892e-13	PLXNA4, SOX2, PAX6, ZBTB18, ARX, FAT4, BCL11B, CNTNAP2, ROBO2, SEMA3A, PLCB1, ASPM, PTPRZ1, EOMES, LEF1, FEZF1, HES1, FEZF2, DLX1, NPY, SALL1, CDON, NEUROD1, RELN, NEUROD6, NFIB	236	162	9052	6.15589	2.27599e-10
GOTERM_BP_FAT	GO:2000026~regulation of multicellular organismal development	60	21.2014	1.68241e-12	MEF2C, PLXNA4, PAX6, LRRC17, S1PR1, GPC6, CCSAP, C8ORF4, ROBO2, SEMA3A, PLCB1, DDAH1, ASPM, LRRC7, ISLR2, CDK1, EFNB2, EOMES, LEF1, PRKCB, PRKD1, HES1, SLITRK4, NAB1, ZFPM2, RELN, NFE2L2, EIF2AK2, ACVR1, SOX2, SOX5, SOX6, SOX9, TIMP2, SOX8, FAT4, FAM213A, BCL11B, TCF4, PLXND1, GNRH1, PTPRZ1, CPNE6, NEUROG2, ATXN1, FEZF1, TENM4, FEZF2, NBL1, EPHA7, DLX1, LAMA3, SFRP1, SALL1, CDON, TRPS1, HOPX, NEU…	236	865	9052	2.66053	7.72049e-10
GOTERM_BP_FAT	GO:0051094~positive regulation of developmental process	48	16.9611	7.82622e-12	MEF2C, WNT5B, LMO3, CLU, SOX2, PAX6, SOX5, SOX6, TIMP2, SOX9, SOX8, ARX, EZR, ROBO2, SEMA3A, TCF4, PLCB1, DDAH1, ASPM, LRRC7, ISLR2, CDK1, PTPRZ1, CPNE6, EFNB2, EOMES, LEF1, NEUROG2, HMGA2, PRKCB, PRKD1, ATXN1, TENM4, FEZF1, HES1, LRRC16A, FEZF2, NBL1, SLITRK4, SFRP1, SALL1, CDON, HOPX, NEUROD1, ZFPM2, RELN, HDAC9, ACVR1	236	610	9052	3.01817	3.23221e-09
GOTERM_BP_FAT	GO:0007417~central nervous system development	47	16.6078	9.61116e-12	KCNC2, PLXNA4, ARHGEF28, CLU, SOX2, PAX6, SOX5, SOX6, TIMP2, SOX9, ZBTB18, SOX8, ARX, NPTX1, S1PR1, FAT4, BCL11B, CNTNAP2, PDGFC, ROBO2, SEMA3A, PLCB1, ASPM, PHLDA1, PTPRZ1, PGAP1, OTX1, EOMES, LEF1, RCAN1, NEUROG2, SERPINI1, TENM4, FEZF1, HES1, FEZF2, DLX1, EPHA7, EML1, NPY, SALL1, CDON, NEUROD1, RELN, FABP7, NEUROD6, NFIB	236	591	9052	3.0503	3.60857e-09
GOTERM_BP_FAT	GO:0045595~regulation of cell differentiation	58	20.4947	2.31539e-11	MEF2C, PLXNA4, LMO3, PAX6, LRRC17, ROBO2, SEMA3A, PLCB1, LRRC7, ASPM, ISLR2, CDK1, EFNB2, EOMES, LEF1, HMGA2, PRKD1, HES1, ZFPM2, RELN, NFE2L2, EIF2AK2, ACVR1, WNT5B, SPOCK2, CLU, SOX2, SOX5, SOX6, SOX9, TIMP2, SOX8, FAT4, FAM213A, ITGAV, BCL11B, TCF4, PLXND1, GNRH1, PTPRZ1, CPNE6, NEUROG2, ATXN1, LRRC16A, FEZF1, TENM4, NOTCH2, FEZF2, NBL1, EPHA7, DLX1, SFRP1, SALL1, CDON, TRPS1, HOPX, NEUROD1, H…	236	870	9052	2.55706	7.96881e-09
GOTERM_BP_FAT	GO:0045597~positive regulation of cell differentiation	39	13.7809	7.64909e-11	MEF2C, WNT5B, LMO3, CLU, SOX2, PAX6, SOX5, SOX6, TIMP2, SOX9, SOX8, ROBO2, SEMA3A, TCF4, PLCB1, LRRC7, ASPM, ISLR2, PTPRZ1, CPNE6, EFNB2, EOMES, LEF1, NEUROG2, PRKD1, ATXN1, TENM4, FEZF1, HES1, LRRC16A, FEZF2, NBL1, SFRP1, SALL1, CDON, HOPX, NEUROD1, RELN, ACVR1	236	450	9052	3.32418	2.43006e-08
GOTERM_BP_FAT	GO:0048666~neuron development	55	19.4346	8.5378e-11	NRP2, MEF2C, PLXNA4, OPCML, GABRB2, PAX6, KCNQ3, SLC1A3, CNTNAP2, ROBO2, SEMA3A, LGI1, LRRC7, CDH23, ISLR2, MATN2, EFNB1, EFNB2, COL25A1, FRY, PRKD1, HES1, EPB41L3, SLITRK4, RELN, PRNP, ARHGEF28, TNC, APH1B, CLU, ZBTB18, ARX, NPTX1, EZR, CRB1, FAT4, ITGAV, BCL11B, ETV1, PLXND1, CAP2, PTPRZ1, CPNE6, NEUROG2, GAS7, COL4A5, FEZF1, TENM4, FEZF2, NBL1, MYO10, EPHA7, NPY, NEUROD1, NFIB	236	823	9052	2.56328	2.51865e-08
GOTERM_BP_FAT	GO:0021953~central nervous system neuron differentiation	19	6.71378	1.89953e-10	PLXNA4, ARHGEF28, SOX2, PAX6, EOMES, SOX5, LEF1, NEUROG2, HES1, ARX, FEZF2, DLX1, NPY, BCL11B, SALL1, ROBO2, SEMA3A, NFIB, PHLDA1	236	106	9052	6.87512	5.23005e-08
GOTERM_BP_FAT	GO:0051240~positive regulation of multicellular organismal process	49	17.3145	2.89054e-10	NRP2, MEF2C, CLU, SOX2, PAX6, SOX5, SOX6, IL33, TIMP2, SOX9, SOX8, B2M, ARX, EZR, ROBO2, SEMA3A, TCF4, PLCB1, DDAH1, ASPM, LRRC7, ISLR2, CDK1, RAB8B, PTPRZ1, CPNE6, EFNB2, LEF1, NEUROG2, PRKCB, PRKD1, ATXN1, TENM4, FEZF1, HES1, FEZF2, NBL1, SLITRK4, PENK, SALL1, CDON, NEUROD1, ZFPM2, RELN, NFE2L2, HDAC9, EIF2AK2, NPPA, ACVR1	236	701	9052	2.68109	7.46121e-08
GOTERM_BP_FAT	GO:0040011~locomotion	61	21.5548	3.10321e-10	NRP2, MEF2C, PLXNA4, PAX6, SLC16A1, S1PR1, KCNQ3, SLK, CCSAP, GPC6, PDGFC, ROBO2, SEMA3A, LGI1, PLCB1, ASPM, MATN2, CDK1, EFNB1, EFNB2, LEF1, PRKD1, HES1, RRAS2, RELN, PRNP, SPATA13, ACVR1, WNT5B, ARHGEF28, APH1B, IL33, SOX9, SOX8, NSUN7, VCAM1, ARX, EZR, ITGAV, BCL11B, ETV1, SCARB2, PLXND1, CAP2, GNRH1, PTPRZ1, NEUROG2, COL4A5, LRRC16A, FEZF1, FEZF2, NBL1, EPHA7, MYO10, SYNE2, LAMA3, SFRP1, ITGA…	236	1008	9052	2.32114	7.53897e-08
GOTERM_BP_FAT	GO:0021872~forebrain generation of neurons	13	4.59364	5.33221e-10	HES1, ARX, FEZF2, DLX1, BCL11B, SALL1, SOX2, PAX6, LEF1, ROBO2, SEMA3A, ASPM, PHLDA1	236	43	9052	11.596	1.22345e-07
GOTERM_BP_FAT	GO:0006928~movement of cell or subcellular component	64	22.6148	5.99427e-10	NRP2, KIF23, MEF2C, PLXNA4, PAX6, SLC16A1, FRMD6, S1PR1, KCNQ3, SLK, GPC6, CCSAP, PDGFC, ROBO2, SEMA3A, LGI1, PLCB1, ASPM, DYNC1I1, MATN2, CDK1, EFNB1, EFNB2, LEF1, PRKD1, HES1, RRAS2, RELN, PRNP, SPATA13, ACVR1, WNT5B, ARHGEF28, APH1B, IL33, SOX9, SOX8, NSUN7, VCAM1, ARX, EZR, ITGAV, BCL11B, ETV1, PLXND1, CAP2, GNRH1, PTPRZ1, NEUROG2, COL4A5, LRRC16A, FEZF1, FEZF2, NBL1, EPHA7, MYO10, SYNE2, LAM…	236	1106	9052	2.21951	1.30296e-07
GOTERM_BP_FAT	GO:0021543~pallium development	19	6.71378	7.59295e-10	PTPRZ1, SOX2, PAX6, EOMES, LEF1, ZBTB18, ARX, FEZF2, DLX1, NPY, FAT4, CDON, CNTNAP2, NEUROD1, RELN, SEMA3A, PLCB1, NEUROD6, ASPM	236	115	9052	6.33707	1.56794e-07
GOTERM_BP_FAT	GO:0060284~regulation of cell development	40	14.1343	1.17918e-09	MEF2C, PLXNA4, SOX2, PAX6, SOX5, TIMP2, SOX9, SOX8, BCL11B, ROBO2, SEMA3A, PLXND1, TCF4, ASPM, LRRC7, ISLR2, CDK1, GNRH1, PTPRZ1, CPNE6, EOMES, LEF1, NEUROG2, HMGA2, PRKD1, ATXN1, TENM4, FEZF1, HES1, LRRC16A, FEZF2, NBL1, DLX1, EPHA7, SFRP1, SALL1, CDON, NEUROD1, RELN, HDAC9	236	517	9052	2.96758	2.31906e-07
GOTERM_BP_FAT	GO:0021879~forebrain neuron differentiation	12	4.24028	1.85454e-09	HES1, ARX, FEZF2, DLX1, BCL11B, SALL1, SOX2, PAX6, LEF1, ROBO2, SEMA3A, PHLDA1	236	38	9052	12.1124	3.48147e-07
GOTERM_BP_FAT	GO:0000902~cell morphogenesis	57	20.1413	3.0894e-09	NRP2, MEF2C, PLXNA4, PAX6, FRMD6, KCNQ3, SLC1A3, ROBO2, SEMA3A, LGI1, CDH23, ISLR2, MATN2, EFNB1, EFNB2, EOMES, LEF1, COL25A1, HMGA2, FRY, HES1, EPB41L3, SLITRK4, RELN, PRNP, SHROOM3, ARHGEF28, APH1B, CLU, SOX6, SOX9, ARX, NPTX1, EZR, ITGAV, BCL11B, ETV1, TBC1D1, PLXND1, FGD4, CAP2, RAB8B, PTPRZ1, CPNE6, NEUROG2, GAS7, COL4A5, LRRC16A, FEZF1, FEZF2, NBL1, EPHA7, MYO10, SFRP1, SALL1, ABCC4, NFIB	236	960	9052	2.27738	5.54749e-07
GOTERM_BP_FAT	GO:0009887~organ morphogenesis	37	13.0742	3.96909e-09	MEF2C, TSHZ1, TNC, SOX2, PAX6, LRIG3, SOX9, SOX8, EZR, S1PR1, CRB1, FAT4, BCL11B, GPC6, PDGFC, SEMA3A, PLXND1, COL11A1, CDH23, OTX1, EFNB2, LEF1, HES1, NOTCH2, DLX1, RDH10, ITGA6, SFRP1, TRPS1, CDON, SALL1, NAB1, NEUROD1, ZFPM2, PAPPA2, ACVR1, NFIB	236	471	9052	3.0131	6.83013e-07
GOTERM_BP_FAT	GO:0048870~cell motility	46	16.2544	4.16047e-09	NRP2, MEF2C, WNT5B, PLXNA4, PAX6, IL33, SOX9, SOX8, NSUN7, ARX, VCAM1, SLC16A1, S1PR1, SLK, CCSAP, ITGAV, GPC6, PDGFC, SEMA3A, PLXND1, PLCB1, ASPM, MATN2, CDK1, GNRH1, PTPRZ1, EFNB1, EFNB2, LEF1, NEUROG2, PRKD1, FEZF1, HES1, LRRC16A, FEZF2, NBL1, LAMA3, SYNE2, ITGA6, SFRP1, RRAS2, CPNE3, RELN, HDAC9, SPATA13, ACVR1	236	684	9052	2.57949	6.8731e-07
GOTERM_BP_FAT	GO:0051674~localization of cell	46	16.2544	4.16047e-09	NRP2, MEF2C, WNT5B, PLXNA4, PAX6, IL33, SOX9, SOX8, NSUN7, ARX, VCAM1, SLC16A1, S1PR1, SLK, CCSAP, ITGAV, GPC6, PDGFC, SEMA3A, PLXND1, PLCB1, ASPM, MATN2, CDK1, GNRH1, PTPRZ1, EFNB1, EFNB2, LEF1, NEUROG2, PRKD1, FEZF1, HES1, LRRC16A, FEZF2, NBL1, LAMA3, SYNE2, ITGA6, SFRP1, RRAS2, CPNE3, RELN, HDAC9, SPATA13, ACVR1	236	684	9052	2.57949	6.8731e-07
GOTERM_BP_FAT	GO:0000904~cell morphogenesis involved in differentiation	45	15.9011	4.68525e-09	NRP2, MEF2C, PLXNA4, ARHGEF28, APH1B, PAX6, SOX9, ARX, NPTX1, KCNQ3, FRMD6, EZR, SLC1A3, BCL11B, ITGAV, ETV1, ROBO2, SEMA3A, PLXND1, LGI1, CDH23, ISLR2, MATN2, CAP2, PTPRZ1, EFNB1, EFNB2, EOMES, LEF1, COL25A1, NEUROG2, HMGA2, COL4A5, FEZF1, HES1, LRRC16A, FEZF2, MYO10, EPHA7, SLITRK4, SFRP1, SALL1, RELN, PRNP, NFIB	236	662	9052	2.60728	7.44234e-07
GOTERM_BP_FAT	GO:0032989~cellular component morphogenesis	58	20.4947	5.64556e-09	NRP2, MEF2C, PLXNA4, PAX6, FRMD6, KCNQ3, SLC1A3, ROBO2, SEMA3A, LGI1, CDH23, ISLR2, MATN2, EFNB1, EFNB2, EOMES, LEF1, COL25A1, HMGA2, FRY, HES1, EPB41L3, SLITRK4, RELN, PRNP, SHROOM3, ARHGEF28, APH1B, CLU, SOX6, SOX9, ARX, NPTX1, EZR, ITGAV, BCL11B, ETV1, TBC1D1, PLXND1, FGD4, CAP2, RAB8B, PTPRZ1, CPNE6, NEUROG2, GAS7, COL4A5, LRRC16A, FEZF1, TENM4, FEZF2, NBL1, EPHA7, MYO10, SFRP1, SALL1, ABCC4,…	236	1003	9052	2.21799	8.3272e-07
GOTERM_BP_FAT	GO:0007155~cell adhesion	45	15.9011	5.63779e-09	NRP2, DCHS2, EPDR1, ASS1, OPCML, SPOCK2, NUAK1, TNC, SOX2, SOX9, B2M, VCAM1, IGSF11, CDH20, EZR, S1PR1, SLK, FAT4, BCL11B, ITGAV, CNTNAP2, ROBO2, SCARB2, CDH23, CNTNAP4, GNRH1, PCDH11Y, PTPRZ1, EFNB1, EFNB2, EOMES, LEF1, COL4A6, HES1, LRRC16A, MYO10, EPHA7, LAMA3, ITGA6, SFRP1, CDON, PKP4, RELN, PRNP, CDH10	236	666	9052	2.59162	8.62372e-07
GOTERM_BP_FAT	GO:0022610~biological adhesion	45	15.9011	6.18037e-09	NRP2, DCHS2, EPDR1, ASS1, OPCML, SPOCK2, NUAK1, TNC, SOX2, SOX9, B2M, VCAM1, IGSF11, CDH20, EZR, S1PR1, SLK, FAT4, BCL11B, ITGAV, CNTNAP2, ROBO2, SCARB2, CDH23, CNTNAP4, GNRH1, PCDH11Y, PTPRZ1, EFNB1, EFNB2, EOMES, LEF1, COL4A6, HES1, LRRC16A, MYO10, EPHA7, LAMA3, ITGA6, SFRP1, CDON, PKP4, RELN, PRNP, CDH10	236	668	9052	2.58386	8.80169e-07
GOTERM_BP_FAT	GO:0050767~regulation of neurogenesis	35	12.3675	6.82385e-09	MEF2C, PLXNA4, SOX2, PAX6, SOX5, TIMP2, SOX9, SOX8, BCL11B, ROBO2, SEMA3A, PLXND1, TCF4, LRRC7, ASPM, ISLR2, CDK1, GNRH1, PTPRZ1, CPNE6, EOMES, NEUROG2, PRKD1, TENM4, FEZF1, HES1, ATXN1, FEZF2, NBL1, DLX1, EPHA7, SALL1, CDON, NEUROD1, RELN	236	436	9052	3.07903	9.39416e-07
GOTERM_BP_FAT	GO:0051960~regulation of nervous system development	37	13.0742	7.36687e-09	MEF2C, PLXNA4, SOX2, PAX6, SOX5, TIMP2, SOX9, SOX8, BCL11B, ROBO2, SEMA3A, PLXND1, TCF4, LRRC7, ASPM, ISLR2, CDK1, GNRH1, PTPRZ1, CPNE6, EOMES, NEUROG2, PRKD1, ATXN1, TENM4, FEZF1, HES1, FEZF2, NBL1, DLX1, EPHA7, SLITRK4, SFRP1, SALL1, CDON, NEUROD1, RELN	236	482	9052	2.94434	9.81456e-07
GOTERM_BP_FAT	GO:0050769~positive regulation of neurogenesis	25	8.83392	1.74529e-08	MEF2C, SOX2, PAX6, TIMP2, SOX8, ROBO2, SEMA3A, TCF4, LRRC7, ASPM, ISLR2, PTPRZ1, CPNE6, NEUROG2, TENM4, FEZF1, HES1, ATXN1, PRKD1, FEZF2, NBL1, CDON, SALL1, NEUROD1, RELN	236	244	9052	3.92991	2.25251e-06
GOTERM_BP_FAT	GO:0007420~brain development	35	12.3675	2.23205e-08	KCNC2, PLXNA4, SOX2, PAX6, ZBTB18, ARX, S1PR1, FAT4, BCL11B, CNTNAP2, ROBO2, SEMA3A, PLCB1, ASPM, PHLDA1, PTPRZ1, OTX1, PGAP1, EOMES, LEF1, NEUROG2, FEZF1, HES1, FEZF2, DLX1, EPHA7, EML1, NPY, CDON, SALL1, NEUROD1, RELN, FABP7, NEUROD6, NFIB	236	457	9052	2.93754	2.79344e-06
GOTERM_BP_FAT	GO:0010720~positive regulation of cell development	27	9.54064	2.74321e-08	MEF2C, SOX2, PAX6, TIMP2, SOX8, ROBO2, SEMA3A, TCF4, LRRC7, ASPM, ISLR2, PTPRZ1, CPNE6, LEF1, NEUROG2, TENM4, FEZF1, HES1, LRRC16A, ATXN1, PRKD1, FEZF2, NBL1, CDON, SALL1, NEUROD1, RELN	236	289	9052	3.58343	3.33219e-06
GOTERM_BP_FAT	GO:0016477~cell migration	41	14.4876	3.23358e-08	MEF2C, NRP2, WNT5B, PAX6, IL33, SOX9, SOX8, ARX, VCAM1, SLC16A1, S1PR1, ITGAV, GPC6, PDGFC, SEMA3A, PLXND1, PLCB1, ASPM, MATN2, CDK1, GNRH1, PTPRZ1, EFNB1, EFNB2, LEF1, NEUROG2, PRKD1, FEZF1, HES1, LRRC16A, FEZF2, NBL1, SYNE2, ITGA6, SFRP1, RRAS2, CPNE3, RELN, HDAC9, SPATA13, ACVR1	236	606	9052	2.59504	3.81562e-06
GOTERM_BP_FAT	GO:0051962~positive regulation of nervous system development	26	9.18728	3.92287e-08	MEF2C, SOX2, PAX6, TIMP2, SOX8, ROBO2, SEMA3A, TCF4, LRRC7, ASPM, ISLR2, PTPRZ1, CPNE6, NEUROG2, TENM4, FEZF1, HES1, ATXN1, PRKD1, FEZF2, NBL1, SLITRK4, CDON, SALL1, NEUROD1, RELN	236	274	9052	3.63961	4.5004e-06
GOTERM_BP_FAT	GO:0042063~gliogenesis	19	6.71378	4.60559e-08	MATN2, CDK1, PTPRZ1, SOX2, CLU, PAX6, SOX5, LEF1, SOX6, SOX9, SOX8, ATXN1, HES1, TENM4, DLX1, PENK, NAB1, RELN, NFIB	236	148	9052	4.92407	5.14082e-06
GOTERM_BP_FAT	GO:0040012~regulation of locomotion	32	11.3074	6.22329e-08	NRP2, PLXNA4, WNT5B, PAX6, IL33, SOX9, S1PR1, SLK, CCSAP, ITGAV, PDGFC, ROBO2, SEMA3A, PLCB1, PLXND1, GNRH1, PTPRZ1, EFNB2, LEF1, LRRC16A, PRKD1, FEZF2, NBL1, LAMA3, SYNE2, SFRP1, RRAS2, CPNE3, RELN, HDAC9, SPATA13, ACVR1	236	408	9052	3.00831	6.76371e-06
GOTERM_BP_FAT	GO:0009790~embryo development	39	13.7809	7.31174e-08	MEF2C, TSHZ1, SHROOM3, SOX2, SOX5, TFEB, PAX6, LRIG3, SOX6, SOX9, ZBTB18, SOX8, VCAM1, ITGAV, PDGFC, SEMA3A, PLCB1, COL11A1, CDH23, EFNB1, OTX1, PGAP1, EOMES, LEF1, HMGA2, RNASEH2B, TENM4, HES1, NOTCH2, DLX1, RDH10, LAMA3, SFRP1, SALL1, CDON, HOPX, NEUROD1, ZFPM2, ACVR1	236	575	9052	2.60153	7.74292e-06
GOTERM_BP_FAT	GO:0045664~regulation of neuron differentiation	30	10.6007	7.9281e-08	MEF2C, PLXNA4, SOX2, PAX6, SOX5, TIMP2, SOX9, SOX8, BCL11B, ROBO2, SEMA3A, PLXND1, TCF4, LRRC7, ASPM, ISLR2, PTPRZ1, CPNE6, EOMES, NEUROG2, PRKD1, FEZF1, HES1, FEZF2, NBL1, EPHA7, CDON, SALL1, NEUROD1, RELN	236	368	9052	3.12684	7.79594e-06
GOTERM_BP_FAT	GO:0021536~diencephalon development	10	3.53357	7.66156e-08	HES1, KCNC2, ARX, OTX1, SALL1, SOX2, PAX6, CNTNAP2, LEF1, SEMA3A	236	32	9052	11.9862	7.91053e-06
GOTERM_BP_FAT	GO:0060322~head development	35	12.3675	7.92293e-08	KCNC2, PLXNA4, SOX2, PAX6, ZBTB18, ARX, S1PR1, FAT4, BCL11B, CNTNAP2, ROBO2, SEMA3A, PLCB1, ASPM, PHLDA1, PTPRZ1, OTX1, PGAP1, EOMES, LEF1, NEUROG2, FEZF1, HES1, FEZF2, DLX1, EPHA7, EML1, NPY, CDON, SALL1, NEUROD1, RELN, FABP7, NEUROD6, NFIB	236	481	9052	2.79097	7.98087e-06
GOTERM_BP_FAT	GO:0007267~cell-cell signaling	38	13.4276	1.22871e-07	KCNC2, MEF2C, CPLX2, HMGN3, SNCAIP, GABRB2, TNC, SOX2, SOX9, SOX8, SLC16A1, NPTX1, KCNQ3, SLC1A3, CRB1, LGI1, PLCB1, GABRA2, DLGAP1, RAB8B, CNTNAP4, GNRH1, EFNB1, CPNE6, EFNB2, HMGA2, PRKCB, HES1, ATXN1, NPY, SFRP1, GRIA1, SALL1, VSNL1, PKP4, KCNH7, NEUROD1, RELN	236	562	9052	2.59346	1.18013e-05
GOTERM_BP_FAT	GO:0048667~cell morphogenesis involved in neuron differentiation	37	13.0742	1.43003e-07	MEF2C, NRP2, PLXNA4, ARHGEF28, APH1B, PAX6, ARX, NPTX1, KCNQ3, EZR, SLC1A3, BCL11B, ITGAV, ETV1, ROBO2, SEMA3A, PLXND1, LGI1, CDH23, ISLR2, MATN2, CAP2, PTPRZ1, EFNB1, EFNB2, COL25A1, NEUROG2, COL4A5, FEZF1, HES1, FEZF2, MYO10, EPHA7, SLITRK4, RELN, PRNP, NFIB	236	541	9052	2.62323	1.34227e-05
GOTERM_BP_FAT	GO:0031175~neuron projection development	45	15.9011	1.82757e-07	MEF2C, NRP2, PLXNA4, TNC, ARHGEF28, APH1B, CLU, PAX6, ARX, NPTX1, KCNQ3, EZR, BCL11B, ITGAV, CNTNAP2, ETV1, ROBO2, SEMA3A, PLXND1, LGI1, LRRC7, ISLR2, MATN2, CAP2, PTPRZ1, EFNB1, CPNE6, EFNB2, COL25A1, NEUROG2, GAS7, FRY, COL4A5, PRKD1, FEZF1, EPB41L3, FEZF2, NBL1, MYO10, EPHA7, SLITRK4, NPY, RELN, PRNP, NFIB	236	749	9052	2.30443	1.67728e-05
GOTERM_BP_FAT	GO:0048812~neuron projection morphogenesis	38	13.4276	2.00929e-07	NRP2, PLXNA4, ARHGEF28, APH1B, CLU, PAX6, ARX, NPTX1, KCNQ3, EZR, BCL11B, ITGAV, ETV1, ROBO2, SEMA3A, PLXND1, LGI1, ISLR2, MATN2, CAP2, PTPRZ1, EFNB1, CPNE6, EFNB2, COL25A1, NEUROG2, GAS7, COL4A5, FEZF1, EPB41L3, FEZF2, NBL1, MYO10, EPHA7, SLITRK4, RELN, PRNP, NFIB	236	573	9052	2.54367	1.80398e-05
GOTERM_BP_FAT	GO:0010001~glial cell differentiation	16	5.65371	2.50339e-07	CDK1, PTPRZ1, SOX2, CLU, PAX6, SOX5, LEF1, SOX6, SOX9, SOX8, HES1, TENM4, DLX1, NAB1, RELN, NFIB	236	115	9052	5.33648	2.19977e-05
GOTERM_BP_FAT	GO:0030030~cell projection organization	55	19.4346	3.14529e-07	NRP2, MEF2C, PLXNA4, PAX6, S1PR1, KCNQ3, CNTNAP2, ROBO2, SEMA3A, LGI1, LRRC7, CDH23, ISLR2, MATN2, EFNB1, EFNB2, COL25A1, FRY, PRKD1, EPB41L3, SLITRK4, RELN, PRNP, SPATA13, ARHGEF28, TNC, APH1B, CLU, ARX, NPTX1, EZR, FAT4, ITGAV, BCL11B, ETV1, TBC1D1, PLXND1, FGD4, CAP2, RAB8B, PTPRZ1, CPNE6, NEUROG2, GAS7, COL4A5, LRRC16A, FEZF1, FEZF2, NBL1, EPHA7, MYO10, NPY, ITGA6, ABCC4, NFIB	236	1038	9052	2.03235	2.70622e-05
GOTERM_BP_FAT	GO:0030334~regulation of cell migration	28	9.89399	3.70626e-07	NRP2, PLXNA4, WNT5B, PAX6, IL33, SOX9, S1PR1, SLK, ITGAV, PDGFC, SEMA3A, PLCB1, PLXND1, GNRH1, PTPRZ1, LEF1, LRRC16A, PRKD1, NBL1, SYNE2, LAMA3, SFRP1, RRAS2, CPNE3, RELN, HDAC9, SPATA13, ACVR1	236	351	9052	3.05973	3.1238e-05
GOTERM_BP_FAT	GO:2000145~regulation of cell motility	29	10.2473	4.08835e-07	NRP2, PLXNA4, WNT5B, PAX6, IL33, SOX9, S1PR1, SLK, CCSAP, ITGAV, PDGFC, SEMA3A, PLCB1, PLXND1, GNRH1, PTPRZ1, LEF1, LRRC16A, PRKD1, NBL1, SYNE2, LAMA3, SFRP1, RRAS2, CPNE3, RELN, HDAC9, SPATA13, ACVR1	236	375	9052	2.96619	3.37692e-05
GOTERM_BP_FAT	GO:0035295~tube development	27	9.54064	6.22317e-07	MEF2C, SHROOM3, ASS1, TNC, SOX2, PAX6, SOX9, SOX8, FAT4, ROBO2, PDGFC, PLXND1, EFNB2, LEF1, HES1, ATXN1, NOTCH2, EPHA7, RDH10, ITGA6, SFRP1, TRPS1, SALL1, HOPX, ZFPM2, ACVR1, NFIB	236	338	9052	3.06394	5.03942e-05
GOTERM_BP_FAT	GO:0048598~embryonic morphogenesis	26	9.18728	6.52544e-07	MEF2C, TSHZ1, SHROOM3, OTX1, SOX2, PAX6, EOMES, LEF1, LRIG3, HMGA2, SOX9, SOX8, VCAM1, HES1, TENM4, NOTCH2, RDH10, LAMA3, SFRP1, SALL1, ITGAV, CDON, NEUROD1, COL11A1, ACVR1, CDH23	236	317	9052	3.14591	5.08479e-05
GOTERM_BP_FAT	GO:0007389~pattern specification process	22	7.77385	6.70447e-07	MEF2C, TSHZ1, SHROOM3, PGAP1, OTX1, EFNB1, PAX6, EOMES, LEF1, HES1, FEZF1, NOTCH2, FEZF2, NBL1, DLX1, SFRP1, CDON, NEUROD1, RELN, SEMA3A, PLXND1, ACVR1	236	234	9052	3.60611	5.12755e-05
GOTERM_BP_FAT	GO:0042330~taxis	33	11.6608	6.48493e-07	NRP2, PLXNA4, ARHGEF28, APH1B, PAX6, ARX, VCAM1, KCNQ3, EZR, S1PR1, BCL11B, ITGAV, ETV1, ROBO2, SEMA3A, PLXND1, LGI1, MATN2, CAP2, EFNB1, EFNB2, LEF1, NEUROG2, COL4A5, FEZF1, PRKD1, FEZF2, NBL1, MYO10, EPHA7, RELN, PRNP, NFIB	236	477	9052	2.65356	5.1504e-05
GOTERM_BP_FAT	GO:0006935~chemotaxis	33	11.6608	6.48493e-07	NRP2, PLXNA4, ARHGEF28, APH1B, PAX6, ARX, VCAM1, KCNQ3, EZR, S1PR1, BCL11B, ITGAV, ETV1, ROBO2, SEMA3A, PLXND1, LGI1, MATN2, CAP2, EFNB1, EFNB2, LEF1, NEUROG2, COL4A5, FEZF1, PRKD1, FEZF2, NBL1, MYO10, EPHA7, RELN, PRNP, NFIB	236	477	9052	2.65356	5.1504e-05
GOTERM_BP_FAT	GO:0030155~regulation of cell adhesion	25	8.83392	7.10494e-07	ASS1, NUAK1, SPOCK2, TNC, SOX2, SOX9, VCAM1, S1PR1, SLK, ITGAV, GNRH1, PTPRZ1, EFNB1, EFNB2, LEF1, SERPINI1, LRRC16A, HES1, EPHA7, MYO10, LAMA3, ITGA6, SFRP1, PKP4, PRNP	236	297	9052	3.22861	5.23976e-05
GOTERM_BP_FAT	GO:0061564~axon development	34	12.0141	7.06205e-07	NRP2, PLXNA4, ARHGEF28, TNC, APH1B, PAX6, ARX, NPTX1, KCNQ3, EZR, BCL11B, ITGAV, ETV1, ROBO2, SEMA3A, PLXND1, LGI1, ISLR2, MATN2, CAP2, PTPRZ1, EFNB1, EFNB2, COL25A1, NEUROG2, COL4A5, FEZF1, FEZF2, MYO10, EPHA7, SLITRK4, RELN, PRNP, NFIB	236	503	9052	2.59265	5.30282e-05
GOTERM_BP_FAT	GO:0009605~response to external stimulus	65	22.9682	7.83486e-07	NRP2, MEF2C, PLXNA4, PAX6, B2M, SLC16A1, S1PR1, KCNQ3, SLC1A3, GPC6, CNTNAP2, ROBO2, SEMA3A, LGI1, COL11A1, MATN2, PHYHIP, EFNB1, EFNB2, LEF1, HMGA2, PRKD1, SNTG1, RELN, NFE2L2, EIF2AK2, PRNP, NPPA, SHROOM3, ASS1, TNC, ARHGEF28, APH1B, CLU, SOX2, LIX1, IL33, SOX9, VCAM1, ARX, EZR, ITGAV, BCL11B, PCSK9, ETV1, CLVS1, PLXND1, CAP2, GNRH1, NEUROG2, COL4A5, FEZF1, NOTCH2, FEZF2, NBL1, RDH10, EPHA7, MY…	236	1363	9052	1.82915	5.5788e-05
GOTERM_BP_FAT	GO:0051270~regulation of cellular component movement	30	10.6007	7.73062e-07	NRP2, PLXNA4, WNT5B, PAX6, IL33, SOX9, S1PR1, SLK, CCSAP, ITGAV, PDGFC, SEMA3A, PLCB1, PLXND1, GNRH1, PTPRZ1, LEF1, LRRC16A, PRKD1, FEZF2, NBL1, SYNE2, LAMA3, SFRP1, RRAS2, CPNE3, RELN, HDAC9, SPATA13, ACVR1	236	410	9052	2.80653	5.60115e-05
GOTERM_BP_FAT	GO:0048729~tissue morphogenesis	26	9.18728	1.03685e-06	MEF2C, SHROOM3, TNC, SOX2, EFNB2, EOMES, LEF1, HMGA2, SOX9, SOX8, HES1, NOTCH2, RDH10, EPHA7, S1PR1, EZR, SFRP1, FAT4, GPC6, CDON, SALL1, ZFPM2, SEMA3A, PLXND1, COL11A1, ACVR1	236	325	9052	3.06847	7.25772e-05
GOTERM_BP_FAT	GO:0007409~axonogenesis	33	11.6608	1.06359e-06	NRP2, PLXNA4, ARHGEF28, APH1B, PAX6, ARX, NPTX1, KCNQ3, EZR, BCL11B, ITGAV, ETV1, ROBO2, SEMA3A, PLXND1, LGI1, ISLR2, MATN2, CAP2, PTPRZ1, EFNB1, EFNB2, COL25A1, NEUROG2, COL4A5, FEZF1, FEZF2, EPHA7, SLITRK4, MYO10, RELN, PRNP, NFIB	236	488	9052	2.59374	7.32077e-05
GOTERM_BP_FAT	GO:0045944~positive regulation of transcription from RNA polymerase II promoter	36	12.7208	1.24348e-06	MEF2C, HMGN3, SOX2, SOX5, TFEB, PAX6, SOX6, IL33, SOX9, SOX8, S1PR1, BCL11B, ETV1, TCF4, OTX1, EOMES, LEF1, ATAD2, NEUROG2, HMGA2, NRIP1, PRKD1, HES1, ATXN1, FEZF2, ITGA6, SALL1, TRPS1, CDON, NEUROD1, ZFPM2, NFE2L2, NEUROD6, NFIA, NFIB, ACVR1	236	566	9052	2.4396	8.41863e-05
GOTERM_BP_FAT	GO:0014033~neural crest cell differentiation	10	3.53357	1.47552e-06	MEF2C, HES1, RDH10, SFRP1, EFNB1, LEF1, SEMA3A, SOX9, SOX8, ACVR1	236	44	9052	8.71726	9.82836e-05
GOTERM_BP_FAT	GO:0003002~regionalization	18	6.36042	1.69774e-06	MEF2C, TSHZ1, PGAP1, OTX1, PAX6, EOMES, LEF1, HES1, FEZF1, NBL1, FEZF2, DLX1, SFRP1, CDON, NEUROD1, RELN, SEMA3A, ACVR1	236	169	9052	4.08525	0.00011129
GOTERM_BP_FAT	GO:0007411~axon guidance	28	9.89399	1.76475e-06	NRP2, PLXNA4, ARHGEF28, APH1B, PAX6, ARX, KCNQ3, EZR, BCL11B, ITGAV, ETV1, ROBO2, SEMA3A, PLXND1, LGI1, MATN2, CAP2, EFNB1, EFNB2, NEUROG2, COL4A5, FEZF1, FEZF2, EPHA7, MYO10, RELN, PRNP, NFIB	236	380	9052	2.82623	0.000113875
GOTERM_BP_FAT	GO:0097485~neuron projection guidance	28	9.89399	1.76475e-06	NRP2, PLXNA4, ARHGEF28, APH1B, PAX6, ARX, KCNQ3, EZR, BCL11B, ITGAV, ETV1, ROBO2, SEMA3A, PLXND1, LGI1, MATN2, CAP2, EFNB1, EFNB2, NEUROG2, COL4A5, FEZF1, FEZF2, EPHA7, MYO10, RELN, PRNP, NFIB	236	380	9052	2.82623	0.000113875
GOTERM_BP_FAT	GO:0021987~cerebral cortex development	13	4.59364	2.24387e-06	ARX, NPY, FAT4, CDON, SOX2, EOMES, PAX6, CNTNAP2, RELN, SEMA3A, PLCB1, ZBTB18, ASPM	236	87	9052	5.73135	0.000142562
GOTERM_BP_FAT	GO:0021675~nerve development	9	3.18021	2.95705e-06	NRP2, HES1, NPTX1, SLC1A3, PLXNA4, GABRB2, SALL1, COL25A1, SEMA3A	236	36	9052	9.58898	0.000185023
GOTERM_BP_FAT	GO:0007423~sensory organ development	23	8.12721	3.0097e-06	GPD2, TSHZ1, WNT5B, GABRB2, OTX1, SOX2, PAX6, LEF1, LRIG3, SOX9, SOX8, HES1, NOTCH2, RDH10, CHRDL1, CRB1, FAT4, BCL11B, CDON, SALL1, NEUROD1, COL11A1, CDH23	236	278	9052	3.17333	0.000185506
GOTERM_BP_FAT	GO:0048863~stem cell differentiation	20	7.06714	3.85728e-06	MEF2C, EFNB1, SOX2, EOMES, SOX5, LEF1, SOX6, HMGA2, SOX9, SOX8, HES1, NOTCH2, RDH10, SFRP1, SALL1, SEMA3A, NFE2L2, EIF2AK2, ASPM, ACVR1	236	219	9052	3.50282	0.000234246
GOTERM_BP_FAT	GO:0008284~positive regulation of cell proliferation	27	9.54064	4.56814e-06	MEF2C, NRP2, TNC, SOX2, CLU, PAX6, SOX9, SOX8, VCAM1, S1PR1, ITGAV, PDGFC, ASPM, CDK1, PTPRZ1, EFNB1, LEF1, HMGA2, RNASEH2B, HES1, ATXN1, PRKD1, NOTCH2, SFRP1, CDON, KIAA1524, CDCA7L	236	376	9052	2.75428	0.000269484
GOTERM_BP_FAT	GO:0048709~oligodendrocyte differentiation	10	3.53357	4.55281e-06	TENM4, HES1, DLX1, PTPRZ1, CLU, PAX6, SOX5, SOX6, SOX9, SOX8	236	50	9052	7.67119	0.000272472
GOTERM_BP_FAT	GO:0031328~positive regulation of cellular biosynthetic process	51	18.0212	5.81508e-06	MEF2C, HMGN3, PAX6, S1PR1, GUCY1A2, PDGFC, PLCB1, DDAH1, CDK1, OTX1, EOMES, LEF1, HMGA2, PRKCB, NRIP1, PRKD1, HES1, ZFPM2, RELN, NFE2L2, EIF2AK2, ACVR1, ASS1, SOX2, CLU, SOX5, TFEB, IL33, SOX6, SOX9, TIMP2, SOX8, BCL11B, ETV1, TCF4, CAP2, ATAD2, NEUROG2, CREB5, ATXN1, FEZF1, FEZF2, SFRP1, ITGA6, SALL1, CDON, TRPS1, NEUROD1, NEUROD6, NFIA, NFIB	236	1022	9052	1.91404	0.000338201
GOTERM_BP_FAT	GO:0001763~morphogenesis of a branching structure	13	4.59364	7.17042e-06	RDH10, EPHA7, SFRP1, FAT4, TNC, SALL1, SOX2, LEF1, SEMA3A, SOX9, PLXND1, SOX8, ACVR1	236	97	9052	5.14049	0.00041122
GOTERM_BP_FAT	GO:1903508~positive regulation of nucleic acid-templated transcription	44	15.5477	7.573e-06	MEF2C, HMGN3, CLU, SOX2, TFEB, PAX6, SOX5, SOX6, IL33, SOX9, SOX8, S1PR1, BCL11B, ETV1, TCF4, PLCB1, OTX1, EOMES, LEF1, ATAD2, CREB5, NEUROG2, HMGA2, PRKCB, NRIP1, PRKD1, FEZF1, HES1, ATXN1, FEZF2, ITGA6, SFRP1, SALL1, TRPS1, CDON, NEUROD1, ZFPM2, RELN, NFE2L2, EIF2AK2, NEUROD6, NFIA, NFIB, ACVR1	236	831	9052	2.03088	0.000428355
GOTERM_BP_FAT	GO:0045893~positive regulation of transcription, DNA-templated	44	15.5477	7.573e-06	MEF2C, HMGN3, CLU, SOX2, TFEB, PAX6, SOX5, SOX6, IL33, SOX9, SOX8, S1PR1, BCL11B, ETV1, TCF4, PLCB1, OTX1, EOMES, LEF1, ATAD2, CREB5, NEUROG2, HMGA2, PRKCB, NRIP1, PRKD1, FEZF1, HES1, ATXN1, FEZF2, ITGA6, SFRP1, SALL1, TRPS1, CDON, NEUROD1, ZFPM2, RELN, NFE2L2, EIF2AK2, NEUROD6, NFIA, NFIB, ACVR1	236	831	9052	2.03088	0.000428355
GOTERM_BP_FAT	GO:0009891~positive regulation of biosynthetic process	51	18.0212	8.30064e-06	MEF2C, HMGN3, PAX6, S1PR1, GUCY1A2, PDGFC, PLCB1, DDAH1, CDK1, OTX1, EOMES, LEF1, HMGA2, PRKCB, NRIP1, PRKD1, HES1, ZFPM2, RELN, NFE2L2, EIF2AK2, ACVR1, ASS1, SOX2, CLU, SOX5, TFEB, IL33, SOX6, SOX9, TIMP2, SOX8, BCL11B, ETV1, TCF4, CAP2, ATAD2, NEUROG2, CREB5, ATXN1, FEZF1, FEZF2, SFRP1, ITGA6, SALL1, CDON, TRPS1, NEUROD1, NEUROD6, NFIA, NFIB	236	1035	9052	1.89	0.00046316
GOTERM_BP_FAT	GO:0048646~anatomical structure formation involved in morphogenesis	36	12.7208	9.33715e-06	MEF2C, NRP2, SHROOM3, SOX2, PAX6, SOX9, SOX8, S1PR1, ITGAV, PLXND1, DDAH1, COL11A1, RAB8B, EFNB2, EOMES, LEF1, HMGA2, PRKCB, PRKD1, TENM4, HES1, EPB41L3, RDH10, LAMA3, ITGA6, NUS1, SFRP1, TRPS1, CDON, SALL1, HOPX, ABCC4, RELN, HDAC9, NFIB, ACVR1	236	619	9052	2.23072	0.000514036
GOTERM_BP_FAT	GO:0048589~developmental growth	26	9.18728	1.0591e-05	MEF2C, NRP2, PLXNA4, TNC, SOX2, SOX9, ARX, S1PR1, EZR, SEMA3A, PLXND1, PLCB1, ASPM, ISLR2, GPD2, CDK1, CPNE6, GAS1, TENM4, NOTCH2, EPHA7, RDH10, SFRP1, SALL1, HOPX, NPPA	236	370	9052	2.69528	0.000575375
GOTERM_BP_FAT	GO:0022603~regulation of anatomical structure morphogenesis	32	11.3074	1.13472e-05	MEF2C, SHROOM3, PLXNA4, SOX9, SOX8, EZR, GPC6, ROBO2, SEMA3A, PLXND1, TBC1D1, DDAH1, ISLR2, FGD4, PTPRZ1, CPNE6, LEF1, GAS7, PRKCB, TENM4, HES1, LRRC16A, PRKD1, EPB41L3, FEZF2, MYO10, EPHA7, SFRP1, SALL1, RELN, HDAC9, NFIB	236	520	9052	2.36037	0.000608439
GOTERM_BP_FAT	GO:0048608~reproductive structure development	19	6.71378	1.22232e-05	GNRH1, TNC, SOX2, TFEB, EOMES, LEF1, SOX9, SOX8, NRIP1, VCAM1, HES1, NOTCH2, RDH10, SFRP1, SALL1, ROBO2, ZFPM2, SEMA3A, ASPM	236	216	9052	3.3739	0.000638808
GOTERM_BP_FAT	GO:0043583~ear development	13	4.59364	1.21181e-05	HES1, RDH10, TSHZ1, FAT4, GABRB2, OTX1, SALL1, SOX2, NEUROD1, LRIG3, SOX9, COL11A1, CDH23	236	102	9052	4.8885	0.000641434
GOTERM_BP_FAT	GO:0061458~reproductive system development	19	6.71378	1.385e-05	GNRH1, TNC, SOX2, TFEB, EOMES, LEF1, SOX9, SOX8, NRIP1, VCAM1, HES1, NOTCH2, RDH10, SFRP1, SALL1, ROBO2, ZFPM2, SEMA3A, ASPM	236	218	9052	3.34295	0.000714758
GOTERM_BP_FAT	GO:0002062~chondrocyte differentiation	9	3.18021	1.4476e-05	MEF2C, WNT5B, TRPS1, SOX5, SOX6, HMGA2, SOX9, COL11A1, NFIB	236	44	9052	7.84553	0.000737828
GOTERM_BP_FAT	GO:0050795~regulation of behavior	13	4.59364	1.48107e-05	MEF2C, PLXNA4, CNTNAP4, EFNB2, PRKD1, NBL1, FEZF2, S1PR1, PENK, ROBO2, RELN, SEMA3A, PLXND1	236	104	9052	4.79449	0.000745682
GOTERM_BP_FAT	GO:0048858~cell projection morphogenesis	40	14.1343	1.5124e-05	NRP2, PLXNA4, ARHGEF28, APH1B, CLU, PAX6, ARX, NPTX1, KCNQ3, EZR, BCL11B, ITGAV, ETV1, ROBO2, SEMA3A, PLXND1, LGI1, ISLR2, MATN2, CAP2, RAB8B, PTPRZ1, EFNB1, CPNE6, EFNB2, COL25A1, NEUROG2, GAS7, COL4A5, FEZF1, EPB41L3, FEZF2, NBL1, MYO10, EPHA7, SLITRK4, ABCC4, RELN, PRNP, NFIB	236	742	9052	2.06771	0.000752278
GOTERM_BP_FAT	GO:1902680~positive regulation of RNA biosynthetic process	44	15.5477	1.63442e-05	MEF2C, HMGN3, CLU, SOX2, TFEB, PAX6, SOX5, SOX6, IL33, SOX9, SOX8, S1PR1, BCL11B, ETV1, TCF4, PLCB1, OTX1, EOMES, LEF1, ATAD2, CREB5, NEUROG2, HMGA2, PRKCB, NRIP1, PRKD1, FEZF1, HES1, ATXN1, FEZF2, ITGA6, SFRP1, SALL1, TRPS1, CDON, NEUROD1, ZFPM2, RELN, NFE2L2, EIF2AK2, NEUROD6, NFIA, NFIB, ACVR1	236	857	9052	1.96927	0.000803271
GOTERM_BP_FAT	GO:0045666~positive regulation of neuron differentiation	18	6.36042	1.76921e-05	MEF2C, PTPRZ1, CPNE6, SOX2, NEUROG2, TIMP2, PRKD1, FEZF1, FEZF2, NBL1, CDON, SALL1, NEUROD1, ROBO2, RELN, TCF4, LRRC7, ISLR2	236	201	9052	3.43486	0.000849281
GOTERM_BP_FAT	GO:0061138~morphogenesis of a branching epithelium	12	4.24028	1.75234e-05	RDH10, SFRP1, FAT4, TNC, SALL1, SOX2, LEF1, SEMA3A, PLXND1, SOX9, SOX8, ACVR1	236	89	9052	5.17159	0.000851078
GOTERM_BP_FAT	GO:0042127~regulation of cell proliferation	40	14.1343	1.82075e-05	MEF2C, NRP2, NUAK1, TNC, CLU, SOX2, PAX6, TIMP2, SOX9, SOX8, ARX, VCAM1, S1PR1, BCL11B, ITGAV, PDGFC, ASPM, CDK1, GNRH1, PTPRZ1, EFNB1, EFNB2, LEF1, HMGA2, RNASEH2B, PRKD1, FEZF1, HES1, ATXN1, NOTCH2, FEZF2, SFRP1, KIAA1524, CDON, SALL1, CDCA7L, FABP7, PRNP, EIF2AK2, NFIB	236	748	9052	2.05112	0.000863967
GOTERM_BP_FAT	GO:0051173~positive regulation of nitrogen compound metabolic process	51	18.0212	1.92217e-05	MEF2C, HMGN3, PAX6, S1PR1, GUCY1A2, PDGFC, PLCB1, DDAH1, CDK1, OTX1, EOMES, LEF1, HMGA2, PRKCB, NRIP1, PRKD1, HES1, ZFPM2, RELN, NFE2L2, EIF2AK2, ACVR1, ASS1, SOX2, CLU, SOX5, TFEB, IL33, SOX6, SOX9, TIMP2, SOX8, BCL11B, ETV1, TCF4, CAP2, ATAD2, NEUROG2, CREB5, ATXN1, FEZF1, FEZF2, SFRP1, ITGA6, SALL1, CDON, TRPS1, NEUROD1, NEUROD6, NFIA, NFIB	236	1067	9052	1.83332	0.000901712
GOTERM_BP_FAT	GO:0045935~positive regulation of nucleobase-containing compound metabolic process	49	17.3145	2.03541e-05	MEF2C, HMGN3, PAX6, S1PR1, GUCY1A2, PDGFC, PLCB1, CDK1, OTX1, EOMES, LEF1, HMGA2, NRIP1, PRKCB, HES1, PRKD1, RELN, ZFPM2, NFE2L2, EIF2AK2, ACVR1, SOX2, CLU, SOX5, TFEB, IL33, SOX6, SOX9, TIMP2, SOX8, BCL11B, ETV1, TCF4, CAP2, ATAD2, NEUROG2, CREB5, FEZF1, ATXN1, FEZF2, ITGA6, SFRP1, CDON, TRPS1, SALL1, NEUROD1, NEUROD6, NFIA, NFIB	236	1010	9052	1.86083	0.000944084
GOTERM_BP_FAT	GO:0048762~mesenchymal cell differentiation	12	4.24028	2.16953e-05	MEF2C, HES1, RDH10, SFRP1, EFNB1, EOMES, LEF1, SEMA3A, HMGA2, SOX9, SOX8, ACVR1	236	91	9052	5.05793	0.00099509
GOTERM_BP_FAT	GO:0030855~epithelial cell differentiation	21	7.42049	2.28769e-05	MEF2C, CDK1, WNT5B, SHROOM3, SOX2, PAX6, LEF1, SOX9, SOX8, HES1, ARX, FRMD6, S1PR1, EZR, FAT4, BCL11B, SALL1, NEUROD1, ACVR1, CDH23, NFIB	236	270	9052	2.98324	0.00103773
GOTERM_BP_FAT	GO:0040007~growth	33	11.6608	2.36403e-05	MEF2C, NRP2, PLXNA4, TNC, SOX2, SOX9, ARX, EZR, FAM107A, S1PR1, ITGAV, SEMA3A, PLXND1, LGI1, PLCB1, ASPM, ISLR2, GPD2, CDK1, CPNE6, LEF1, GAS1, RFTN1, TENM4, NOTCH2, EPB41L3, EPHA7, RDH10, SFRP1, SALL1, HOPX, PAPPA2, NPPA	236	566	9052	2.2363	0.00106069
GOTERM_BP_FAT	GO:0021761~limbic system development	10	3.53357	2.45804e-05	FEZF2, DLX1, PTPRZ1, CNTNAP2, LEF1, NEUROD1, RELN, SEMA3A, NEUROD6, ZBTB18	236	61	9052	6.28786	0.001091
GOTERM_BP_FAT	GO:0030335~positive regulation of cell migration	17	6.00707	2.54766e-05	NRP2, WNT5B, PTPRZ1, LEF1, SOX9, LRRC16A, PRKD1, SYNE2, S1PR1, ITGAV, RRAS2, RELN, CPNE3, PDGFC, SEMA3A, HDAC9, ACVR1	236	186	9052	3.50565	0.00110696
GOTERM_BP_FAT	GO:0072358~cardiovascular system development	31	10.9541	2.57588e-05	MEF2C, NRP2, PAX6, SOX6, SOX9, VCAM1, S1PR1, FAT4, ITGAV, PLXND1, COL11A1, DDAH1, CDK1, EFNB2, EOMES, LEF1, PRKCB, TENM4, HES1, PRKD1, NOTCH2, ADAMTS6, NUS1, SFRP1, TRPS1, SALL1, HOPX, ZFPM2, HDAC9, NPPA, ACVR1	236	516	9052	2.30433	0.00110757
GOTERM_BP_FAT	GO:0072359~circulatory system development	31	10.9541	2.57588e-05	MEF2C, NRP2, PAX6, SOX6, SOX9, VCAM1, S1PR1, FAT4, ITGAV, PLXND1, COL11A1, DDAH1, CDK1, EFNB2, EOMES, LEF1, PRKCB, TENM4, HES1, PRKD1, NOTCH2, ADAMTS6, NUS1, SFRP1, TRPS1, SALL1, HOPX, ZFPM2, HDAC9, NPPA, ACVR1	236	516	9052	2.30433	0.00110757
GOTERM_BP_FAT	GO:0032990~cell part morphogenesis	40	14.1343	2.54068e-05	NRP2, PLXNA4, ARHGEF28, APH1B, CLU, PAX6, ARX, NPTX1, KCNQ3, EZR, BCL11B, ITGAV, ETV1, ROBO2, SEMA3A, PLXND1, LGI1, ISLR2, MATN2, CAP2, RAB8B, PTPRZ1, EFNB1, CPNE6, EFNB2, COL25A1, NEUROG2, GAS7, COL4A5, FEZF1, EPB41L3, FEZF2, NBL1, MYO10, EPHA7, SLITRK4, ABCC4, RELN, PRNP, NFIB	236	759	9052	2.02139	0.00111567
GOTERM_BP_FAT	GO:0060429~epithelium development	32	11.3074	2.75721e-05	MEF2C, SHROOM3, WNT5B, TNC, SOX2, PAX6, SOX9, SOX8, ARX, FRMD6, EZR, S1PR1, FAT4, BCL11B, GPC6, ROBO2, SEMA3A, PLXND1, CDH23, CDK1, EFNB2, LEF1, HES1, NOTCH2, EPHA7, RDH10, LAMA3, SFRP1, SALL1, NEUROD1, ACVR1, NFIB	236	544	9052	2.25623	0.00117327
GOTERM_BP_FAT	GO:2000147~positive regulation of cell motility	17	6.00707	3.10298e-05	NRP2, WNT5B, PTPRZ1, LEF1, SOX9, LRRC16A, PRKD1, SYNE2, S1PR1, ITGAV, RRAS2, RELN, CPNE3, PDGFC, SEMA3A, HDAC9, ACVR1	236	189	9052	3.45	0.00130685
GOTERM_BP_FAT	GO:0060537~muscle tissue development	17	6.00707	3.33973e-05	MEF2C, CDK1, EFNB2, EOMES, LEF1, SOX6, SOX9, SOX8, ZBTB18, TENM4, S1PR1, CDON, ZFPM2, HDAC9, COL11A1, NPPA, ACVR1	236	190	9052	3.43185	0.00139229
GOTERM_BP_FAT	GO:0002009~morphogenesis of an epithelium	20	7.06714	3.56895e-05	MEF2C, SHROOM3, TNC, EFNB2, SOX2, LEF1, SOX9, SOX8, HES1, NOTCH2, RDH10, EPHA7, EZR, SFRP1, FAT4, GPC6, SALL1, SEMA3A, PLXND1, ACVR1	236	256	9052	2.99656	0.00144406
GOTERM_BP_FAT	GO:0048568~embryonic organ development	18	6.36042	3.52365e-05	MEF2C, TSHZ1, OTX1, SOX2, PAX6, TFEB, EOMES, LEF1, LRIG3, SOX9, VCAM1, HES1, RDH10, SALL1, NEUROD1, COL11A1, ACVR1, CDH23	236	212	9052	3.25664	0.00145424
GOTERM_BP_FAT	GO:0051254~positive regulation of RNA metabolic process	44	15.5477	3.56756e-05	MEF2C, HMGN3, CLU, SOX2, TFEB, PAX6, SOX5, SOX6, IL33, SOX9, SOX8, S1PR1, BCL11B, ETV1, TCF4, PLCB1, OTX1, EOMES, LEF1, ATAD2, CREB5, NEUROG2, HMGA2, PRKCB, NRIP1, PRKD1, FEZF1, HES1, ATXN1, FEZF2, ITGA6, SFRP1, SALL1, TRPS1, CDON, NEUROD1, ZFPM2, RELN, NFE2L2, EIF2AK2, NEUROD6, NFIA, NFIB, ACVR1	236	885	9052	1.90696	0.00145778
GOTERM_BP_FAT	GO:0001764~neuron migration	12	4.24028	3.97673e-05	FEZF1, MEF2C, ARX, MATN2, FEZF2, GNRH1, PTPRZ1, PAX6, RELN, NEUROG2, SEMA3A, ASPM	236	97	9052	4.74506	0.00159332
GOTERM_BP_FAT	GO:0051272~positive regulation of cellular component movement	17	6.00707	4.27236e-05	NRP2, WNT5B, PTPRZ1, LEF1, SOX9, LRRC16A, PRKD1, SYNE2, S1PR1, ITGAV, RRAS2, RELN, CPNE3, PDGFC, SEMA3A, HDAC9, ACVR1	236	194	9052	3.36109	0.00169522
GOTERM_BP_FAT	GO:0008283~cell proliferation	46	16.2544	4.70495e-05	MEF2C, NRP2, TNC, CLU, SOX2, SOX5, PAX6, LRRC17, TIMP2, SOX9, SOX8, ARX, VCAM1, S1PR1, BCL11B, ITGAV, PDGFC, LGI1, ASPM, CDK1, GNRH1, PTPRZ1, EFNB1, EFNB2, LEF1, HMGA2, RNASEH2B, PRKD1, TENM4, FEZF1, HES1, ATXN1, NOTCH2, FEZF2, EML1, NPY, SFRP1, PENK, KIAA1524, SALL1, CDON, CDCA7L, FABP7, PRNP, EIF2AK2, NFIB	236	954	9052	1.84945	0.00184894
GOTERM_BP_FAT	GO:0021781~glial cell fate commitment	5	1.76678	5.0358e-05	SOX2, PAX6, SOX6, SOX9, SOX8	236	9	9052	21.3089	0.00194189
GOTERM_BP_FAT	GO:0048562~embryonic organ morphogenesis	14	4.947	4.98894e-05	MEF2C, TSHZ1, OTX1, SOX2, PAX6, LRIG3, SOX9, HES1, RDH10, SALL1, NEUROD1, COL11A1, ACVR1, CDH23	236	136	9052	3.9484	0.00194196
GOTERM_BP_FAT	GO:0001655~urogenital system development	16	5.65371	5.09972e-05	MEF2C, ASS1, TNC, EFNB2, LEF1, SOX9, SOX8, HES1, RDH10, EPHA7, ITGA6, SFRP1, FAT4, SALL1, PCSK9, ROBO2	236	176	9052	3.4869	0.00194832
GOTERM_BP_FAT	GO:0060485~mesenchyme development	13	4.59364	5.30556e-05	MEF2C, HES1, RDH10, SFRP1, EFNB1, EOMES, LEF1, ZFPM2, SEMA3A, HMGA2, SOX9, SOX8, ACVR1	236	118	9052	4.22565	0.00199007
GOTERM_BP_FAT	GO:0061351~neural precursor cell proliferation	11	3.88693	5.30378e-05	ARX, EML1, PTPRZ1, KIAA1524, CDON, SOX2, PAX6, SOX5, LEF1, FABP7, ASPM	236	83	9052	5.08332	0.00200763
GOTERM_BP_FAT	GO:0040017~positive regulation of locomotion	17	6.00707	5.47128e-05	NRP2, WNT5B, PTPRZ1, LEF1, SOX9, LRRC16A, PRKD1, SYNE2, S1PR1, ITGAV, RRAS2, RELN, CPNE3, PDGFC, SEMA3A, HDAC9, ACVR1	236	198	9052	3.29319	0.0020337
GOTERM_BP_FAT	GO:0014706~striated muscle tissue development	16	5.65371	5.80456e-05	MEF2C, CDK1, EFNB2, EOMES, LEF1, SOX6, SOX8, ZBTB18, TENM4, S1PR1, CDON, ZFPM2, HDAC9, COL11A1, NPPA, ACVR1	236	178	9052	3.44772	0.00213821
GOTERM_BP_FAT	GO:0072089~stem cell proliferation	10	3.53357	5.96509e-05	EML1, SOX2, PAX6, SOX5, LEF1, EIF2AK2, HMGA2, SOX9, ASPM, NFIB	236	68	9052	5.64058	0.00215877
GOTERM_BP_FAT	GO:0072001~renal system development	15	5.30035	5.95169e-05	MEF2C, ASS1, EFNB2, LEF1, SOX9, SOX8, HES1, EPHA7, RDH10, ITGA6, SFRP1, FAT4, SALL1, PCSK9, ROBO2	236	158	9052	3.64139	0.00217296
GOTERM_BP_FAT	GO:0006357~regulation of transcription from RNA polymerase II promoter	49	17.3145	6.56661e-05	MEF2C, HMGN3, PAX6, S1PR1, CDK1, OTX1, EOMES, LEF1, HMGA2, NRIP1, PRKCB, HES1, PRKD1, CHRDL1, ZFPM2, NFE2L2, ACVR1, SOX2, SOX5, TFEB, IL33, SOX6, SOX9, SOX8, ZBTB18, ARX, EZR, BCL11B, ETV1, TCF4, ATAD2, NEUROG2, FEZF1, ATXN1, NBL1, FEZF2, NOTCH2, DLX1, ITGA6, SFRP1, CDON, TRPS1, SALL1, HOPX, NEUROD1, NEUROD6, HDAC9, NFIA, NFIB	236	1057	9052	1.77809	0.00233529
GOTERM_BP_FAT	GO:0014032~neural crest cell development	8	2.82686	6.5225e-05	HES1, RDH10, EFNB1, LEF1, SEMA3A, SOX9, SOX8, ACVR1	236	40	9052	7.67119	0.00233976
GOTERM_BP_FAT	GO:0021954~central nervous system neuron development	9	3.18021	6.79494e-05	ARX, FEZF2, PLXNA4, NPY, ARHGEF28, ROBO2, NEUROG2, SEMA3A, NFIB	236	54	9052	6.39266	0.00237548
GOTERM_BP_FAT	GO:0007507~heart development	22	7.77385	6.76914e-05	MEF2C, CDK1, EFNB2, EOMES, SOX6, SOX9, TENM4, VCAM1, HES1, NOTCH2, ADAMTS6, S1PR1, FAT4, TRPS1, SALL1, HOPX, ZFPM2, HDAC9, PLXND1, COL11A1, NPPA, ACVR1	236	315	9052	2.67883	0.00238668
GOTERM_BP_FAT	GO:0061061~muscle structure development	22	7.77385	7.08458e-05	MEF2C, CDK1, ASS1, EFNB2, EOMES, LEF1, SOX6, SOX9, ZBTB18, SOX8, HES1, SYNE1, S1PR1, CDON, HOPX, ETV1, ZFPM2, PLCB1, HDAC9, COL11A1, NPPA, ACVR1	236	316	9052	2.67035	0.00243539
GOTERM_BP_FAT	GO:0010557~positive regulation of macromolecule biosynthetic process	46	16.2544	7.03587e-05	MEF2C, HMGN3, CLU, SOX2, TFEB, PAX6, SOX5, SOX6, IL33, SOX9, SOX8, S1PR1, BCL11B, ETV1, PDGFC, TCF4, PLCB1, CDK1, OTX1, EOMES, LEF1, ATAD2, CREB5, NEUROG2, HMGA2, PRKCB, NRIP1, PRKD1, FEZF1, HES1, ATXN1, FEZF2, ITGA6, SFRP1, SALL1, TRPS1, CDON, NEUROD1, ZFPM2, RELN, NFE2L2, EIF2AK2, NEUROD6, NFIA, NFIB, ACVR1	236	970	9052	1.81894	0.00243897
GOTERM_BP_FAT	GO:0010628~positive regulation of gene expression	48	16.9611	7.41856e-05	MEF2C, HMGN3, TNC, CLU, SOX2, TFEB, PAX6, SOX5, SOX6, IL33, SOX9, SOX8, ARX, EZR, S1PR1, BCL11B, ETV1, TCF4, PLCB1, CDK1, OTX1, EOMES, LEF1, ATAD2, CREB5, NEUROG2, HMGA2, PRKCB, NRIP1, PRKD1, FEZF1, HES1, ATXN1, FEZF2, ITGA6, SFRP1, SALL1, TRPS1, CDON, NEUROD1, ZFPM2, RELN, NFE2L2, EIF2AK2, NEUROD6, NFIA, NFIB, ACVR1	236	1032	9052	1.784	0.00250831
GOTERM_BP_FAT	GO:0035239~tube morphogenesis	17	6.00707	7.38128e-05	MEF2C, SHROOM3, TNC, EFNB2, SOX2, LEF1, SOX9, SOX8, HES1, RDH10, EPHA7, SFRP1, FAT4, SALL1, PLXND1, ACVR1, NFIB	236	203	9052	3.21207	0.00251632
GOTERM_BP_FAT	GO:0001503~ossification	17	6.00707	7.38128e-05	MEF2C, TNC, SOX2, LEF1, LRRC17, SOX9, SOX8, PRKD1, CHRDL1, S1PR1, PENK, SFRP1, FAT4, RRAS2, NAB1, COL11A1, ACVR1	236	203	9052	3.21207	0.00251632
GOTERM_BP_FAT	GO:0014031~mesenchymal cell development	11	3.88693	7.96739e-05	HES1, RDH10, SFRP1, EFNB1, EOMES, LEF1, SEMA3A, HMGA2, SOX9, SOX8, ACVR1	236	87	9052	4.8496	0.00267176
GOTERM_BP_FAT	GO:0007610~behavior	25	8.83392	8.18768e-05	MEF2C, PLXNA4, SLC16A1, SLC1A3, S1PR1, CNTNAP2, ETV1, ROBO2, SEMA3A, PLXND1, PLCB1, CDH23, CNTNAP4, PTPRZ1, EFNB2, HOMER2, PRKD1, ATXN1, NBL1, FEZF2, NPY, PENK, GRIA1, RELN, PRNP	236	393	9052	2.43994	0.00272342
GOTERM_BP_FAT	GO:0060562~epithelial tube morphogenesis	16	5.65371	8.48191e-05	MEF2C, SHROOM3, TNC, EFNB2, SOX2, LEF1, SOX9, SOX8, HES1, RDH10, EPHA7, SFRP1, FAT4, SALL1, PLXND1, ACVR1	236	184	9052	3.3353	0.00279862
GOTERM_BP_FAT	GO:0072073~kidney epithelium development	10	3.53357	9.41483e-05	MEF2C, HES1, EPHA7, SFRP1, FAT4, SALL1, EFNB2, ROBO2, SOX9, SOX8	236	72	9052	5.32721	0.00308136
GOTERM_BP_FAT	GO:0006366~transcription from RNA polymerase II promoter	50	17.6678	9.67023e-05	MEF2C, HMGN3, PAX6, S1PR1, CDK1, OTX1, EOMES, LEF1, HMGA2, NRIP1, HES1, PRKD1, CHRDL1, ZFPM2, NFE2L2, NPPA, ACVR1, SOX2, SOX5, TFEB, IL33, SOX6, SOX9, SOX8, ZBTB18, ARX, EZR, BCL11B, ETV1, TCF4, ATAD2, NEUROG2, CREB5, FEZF1, ATXN1, NOTCH2, NBL1, FEZF2, DLX1, ITGA6, SFRP1, CDON, TRPS1, SALL1, HOPX, NEUROD1, NEUROD6, HDAC9, NFIA, NFIB	236	1104	9052	1.73713	0.00313994
GOTERM_BP_FAT	GO:0098609~cell-cell adhesion	25	8.83392	0.000112192	DCHS2, ASS1, GNRH1, PCDH11Y, EFNB1, EFNB2, SOX2, EOMES, LEF1, SOX9, B2M, VCAM1, HES1, CDH20, MYO10, EZR, ITGA6, FAT4, BCL11B, ITGAV, PKP4, ROBO2, PRNP, CDH10, CDH23	236	401	9052	2.39127	0.00361361
GOTERM_BP_FAT	GO:0001501~skeletal system development	18	6.36042	0.000120976	MEF2C, WNT5B, USP1, SOX5, LRRC17, SOX6, HMGA2, SOX9, RDH10, DLX1, SFRP1, FAT4, TRPS1, NAB1, PDGFC, PAPPA2, COL11A1, NFIB	236	234	9052	2.95046	0.00386584
GOTERM_BP_FAT	GO:0001708~cell fate specification	7	2.4735	0.000122655	TENM4, CDON, SOX2, EOMES, PAX6, SOX6, SOX9	236	31	9052	8.66102	0.00388931
GOTERM_BP_FAT	GO:0090596~sensory organ morphogenesis	13	4.59364	0.0001265	NOTCH2, TSHZ1, CRB1, CDON, OTX1, SALL1, SOX2, PAX6, LRIG3, SOX9, COL11A1, SOX8, CDH23	236	129	9052	3.86533	0.00398045
GOTERM_BP_FAT	GO:0048754~branching morphogenesis of an epithelial tube	10	3.53357	0.000129857	RDH10, FAT4, TNC, SALL1, SOX2, LEF1, PLXND1, SOX9, SOX8, ACVR1	236	75	9052	5.11412	0.00405496
GOTERM_BP_FAT	GO:0035051~cardiocyte differentiation	9	3.18021	0.000146147	TENM4, MEF2C, HES1, CDK1, EFNB2, EOMES, SOX6, NPPA, ACVR1	236	60	9052	5.75339	0.00452831
GOTERM_BP_FAT	GO:0022612~gland morphogenesis	9	3.18021	0.000146147	NOTCH2, EZR, SFRP1, TNC, PAX6, SEMA3A, PLXND1, SOX9, NFIB	236	60	9052	5.75339	0.00452831
GOTERM_BP_FAT	GO:0001822~kidney development	14	4.947	0.000156484	MEF2C, HES1, RDH10, EPHA7, SFRP1, ASS1, FAT4, SALL1, EFNB2, LEF1, PCSK9, ROBO2, SOX9, SOX8	236	152	9052	3.53278	0.00481175
GOTERM_BP_FAT	GO:2000736~regulation of stem cell differentiation	9	3.18021	0.000184702	HES1, SFRP1, SOX5, LEF1, SOX6, NFE2L2, EIF2AK2, HMGA2, SOX9	236	62	9052	5.5678	0.00563511
GOTERM_BP_FAT	GO:0035987~endodermal cell differentiation	6	2.12014	0.000207304	LAMA3, ITGAV, SOX2, EOMES, HMGA2, COL11A1	236	22	9052	10.4607	0.00627622
GOTERM_BP_FAT	GO:0048864~stem cell development	15	5.30035	0.000213273	EFNB1, SOX2, EOMES, LEF1, HMGA2, SOX9, SOX8, HES1, NOTCH2, RDH10, SFRP1, SALL1, SEMA3A, ASPM, ACVR1	236	178	9052	3.23224	0.00640939
GOTERM_BP_FAT	GO:0021766~hippocampus development	8	2.82686	0.00021591	FEZF2, DLX1, PTPRZ1, LEF1, NEUROD1, RELN, NEUROD6, ZBTB18	236	48	9052	6.39266	0.00644151
GOTERM_BP_FAT	GO:0033687~osteoblast proliferation	5	1.76678	0.000263234	SFRP1, ITGAV, LRRC17, EIF2AK2, SOX8	236	13	9052	14.7523	0.00779178
GOTERM_BP_FAT	GO:0009952~anterior/posterior pattern specification	11	3.88693	0.000278677	FEZF1, HES1, FEZF2, TSHZ1, SFRP1, PGAP1, OTX1, CDON, PAX6, LEF1, NEUROD1	236	101	9052	4.17738	0.00818842
GOTERM_BP_FAT	GO:0060560~developmental growth involved in morphogenesis	13	4.59364	0.000333641	NRP2, RDH10, EPHA7, S1PR1, PLXNA4, SFRP1, CPNE6, TNC, SALL1, SEMA3A, SOX9, PLXND1, ISLR2	236	143	9052	3.4869	0.00972661
GOTERM_BP_FAT	GO:0008406~gonad development	11	3.88693	0.000353768	RDH10, GNRH1, SFRP1, SALL1, ROBO2, ZFPM2, SEMA3A, SOX9, SOX8, ASPM, NRIP1	236	104	9052	4.05688	0.0102382
GOTERM_BP_FAT	GO:0042471~ear morphogenesis	8	2.82686	0.000359231	TSHZ1, OTX1, SALL1, SOX2, LRIG3, SOX9, COL11A1, CDH23	236	52	9052	5.90091	0.0103232
GOTERM_BP_FAT	GO:0007517~muscle organ development	15	5.30035	0.000375213	MEF2C, CDK1, ASS1, EFNB2, EOMES, LEF1, SOX6, SOX8, ZBTB18, S1PR1, CDON, ETV1, ZFPM2, HDAC9, COL11A1	236	188	9052	3.06031	0.0107056
GOTERM_BP_FAT	GO:0048839~inner ear development	10	3.53357	0.000404961	HES1, FAT4, GABRB2, OTX1, SOX2, NEUROD1, LRIG3, SOX9, COL11A1, CDH23	236	87	9052	4.40873	0.0114705
GOTERM_BP_FAT	GO:0007369~gastrulation	10	3.53357	0.000441085	TENM4, LAMA3, SFRP1, ITGAV, SOX2, EOMES, LEF1, HMGA2, COL11A1, ACVR1	236	88	9052	4.35863	0.0124025
GOTERM_BP_FAT	GO:0045137~development of primary sexual characteristics	11	3.88693	0.000445031	RDH10, GNRH1, SFRP1, SALL1, ROBO2, ZFPM2, SEMA3A, SOX9, SOX8, ASPM, NRIP1	236	107	9052	3.94313	0.0124282
GOTERM_BP_FAT	GO:0045168~cell-cell signaling involved in cell fate commitment	5	1.76678	0.000482371	HES1, SALL1, SOX2, SOX9, SOX8	236	15	9052	12.7853	0.0131098
GOTERM_BP_FAT	GO:0021871~forebrain regionalization	5	1.76678	0.000482371	FEZF1, FEZF2, PGAP1, EOMES, PAX6	236	15	9052	12.7853	0.0131098
GOTERM_BP_FAT	GO:0007548~sex differentiation	12	4.24028	0.000480532	RDH10, GNRH1, SFRP1, SALL1, SOX2, ROBO2, ZFPM2, SEMA3A, SOX9, SOX8, ASPM, NRIP1	236	128	9052	3.59587	0.0131466
GOTERM_BP_FAT	GO:0008038~neuron recognition	6	2.12014	0.00047574	FEZF2, OPCML, PTPRZ1, CNTNAP2, ROBO2, SEMA3A	236	26	9052	8.85137	0.0131911
GOTERM_BP_FAT	GO:0021772~olfactory bulb development	6	2.12014	0.00047574	FEZF1, ARX, SALL1, EOMES, ROBO2, SEMA3A	236	26	9052	8.85137	0.0131911
GOTERM_BP_FAT	GO:0043009~chordate embryonic development	22	7.77385	0.000479922	MEF2C, SHROOM3, SOX5, PAX6, TFEB, EOMES, LEF1, SOX6, ZBTB18, RNASEH2B, SOX8, VCAM1, HES1, NOTCH2, RDH10, DLX1, SFRP1, SALL1, HOPX, ZFPM2, COL11A1, ACVR1	236	363	9052	2.3246	0.0132176
GOTERM_BP_FAT	GO:0001704~formation of primary germ layer	8	2.82686	0.000510097	LAMA3, ITGAV, SOX2, EOMES, LEF1, HMGA2, COL11A1, ACVR1	236	55	9052	5.57904	0.0137678
GOTERM_BP_FAT	GO:0048738~cardiac muscle tissue development	10	3.53357	0.000521306	TENM4, MEF2C, CDK1, S1PR1, EFNB2, ZFPM2, SOX6, COL11A1, NPPA, ACVR1	236	90	9052	4.26177	0.0139769
GOTERM_BP_FAT	GO:0003006~developmental process involved in reproduction	20	7.06714	0.000538551	GNRH1, TNC, SOX2, TFEB, EOMES, LEF1, SOX9, SOX8, NRIP1, VCAM1, HES1, NOTCH2, RDH10, SFRP1, SALL1, ROBO2, ZFPM2, SEMA3A, ASPM, ACVR1	236	315	9052	2.4353	0.014343
GOTERM_BP_FAT	GO:0009792~embryo development ending in birth or egg hatching	22	7.77385	0.000552477	MEF2C, SHROOM3, SOX5, PAX6, TFEB, EOMES, LEF1, SOX6, ZBTB18, RNASEH2B, SOX8, VCAM1, HES1, NOTCH2, RDH10, DLX1, SFRP1, SALL1, HOPX, ZFPM2, COL11A1, ACVR1	236	367	9052	2.29927	0.014617
GOTERM_BP_FAT	GO:0021877~forebrain neuron fate commitment	4	1.41343	0.000559695	FEZF2, DLX1, BCL11B, PAX6	236	7	9052	21.9177	0.0147124
GOTERM_BP_FAT	GO:0035272~exocrine system development	6	2.12014	0.000571637	PAX6, RAB26, SEMA3A, PLXND1, SOX9, NFIB	236	27	9052	8.52354	0.0149291
GOTERM_BP_FAT	GO:0001706~endoderm formation	6	2.12014	0.000571637	LAMA3, ITGAV, SOX2, EOMES, HMGA2, COL11A1	236	27	9052	8.52354	0.0149291
GOTERM_BP_FAT	GO:0001656~metanephros development	7	2.4735	0.00060306	HES1, RDH10, FAT4, SALL1, ROBO2, SOX9, SOX8	236	41	9052	6.54857	0.0156446
GOTERM_BP_FAT	GO:0050877~neurological system process	23	8.12721	0.000631993	MEF2C, GABRB2, PTPRZ1, PGAP1, SOX2, PAX6, LEF1, ATXN1, TENM4, RDH10, ALDH7A1, S1PR1, SLC1A3, PENK, SERPINB6, GRIA1, CNTNAP2, RELN, PLCB1, PRNP, FABP7, COL11A1, CDH23	236	397	9052	2.22213	0.016186
GOTERM_BP_FAT	GO:0042692~muscle cell differentiation	15	5.30035	0.000631756	MEF2C, CDK1, EFNB2, LEF1, SOX6, SOX9, SOX8, HES1, SYNE1, CDON, HOPX, PLCB1, HDAC9, NPPA, ACVR1	236	198	9052	2.90575	0.016281
GOTERM_BP_FAT	GO:0021988~olfactory lobe development	6	2.12014	0.000681343	FEZF1, ARX, SALL1, EOMES, ROBO2, SEMA3A	236	28	9052	8.21913	0.0173319
GOTERM_BP_FAT	GO:0022604~regulation of cell morphogenesis	21	7.42049	0.000685764	PLXNA4, SHROOM3, PTPRZ1, CPNE6, LEF1, GAS7, LRRC16A, EPB41L3, FEZF2, MYO10, EPHA7, EZR, SFRP1, SALL1, ROBO2, RELN, SEMA3A, TBC1D1, PLXND1, ISLR2, FGD4	236	347	9052	2.32125	0.0173367
GOTERM_BP_FAT	GO:2000177~regulation of neural precursor cell proliferation	7	2.4735	0.000783061	PTPRZ1, KIAA1524, CDON, SALL1, SOX2, PAX6, ASPM	236	43	9052	6.24399	0.0196528
GOTERM_BP_FAT	GO:0003008~system process	34	12.0141	0.000791751	MEF2C, GABRB2, SOX2, PAX6, SOX9, EZR, SLC1A3, S1PR1, CNTNAP2, SEMA3A, PLCB1, DDAH1, COL11A1, CDH23, RAB8B, PTPRZ1, PGAP1, LEF1, RCAN1, TENM4, ATXN1, ALDH7A1, RDH10, NPY, SERPINB6, PENK, GRIA1, HOPX, NEUROD1, FBXO32, RELN, FABP7, PRNP, NPPA	236	714	9052	1.82647	0.0197489
GOTERM_BP_FAT	GO:0003205~cardiac chamber development	9	3.18021	0.000823289	MEF2C, HES1, NOTCH2, ADAMTS6, SALL1, ZFPM2, PLXND1, COL11A1, ACVR1	236	77	9052	4.48316	0.0204046
GOTERM_BP_FAT	GO:0048732~gland development	16	5.65371	0.000870158	ASS1, TNC, SOX2, PAX6, LEF1, SOX9, HES1, NOTCH2, EZR, SFRP1, BCL11B, SALL1, PCSK9, SEMA3A, PLXND1, NFIB	236	228	9052	2.69164	0.0214257
GOTERM_BP_FAT	GO:0051241~negative regulation of multicellular organismal process	26	9.18728	0.000902399	MEF2C, GNRH1, PTPRZ1, SOX2, PAX6, LEF1, LRRC17, IL33, SOX9, SOX8, HES1, FEZF2, DLX1, EPHA7, EZR, SFRP1, SALL1, PCSK9, ZFPM2, ROBO2, NFE2L2, SEMA3A, PRNP, ASPM, NPPA, NFIB	236	490	9052	2.03521	0.0219495
GOTERM_BP_FAT	GO:0051216~cartilage development	9	3.18021	0.000897237	MEF2C, WNT5B, TRPS1, SOX5, SOX6, HMGA2, SOX9, COL11A1, NFIB	236	78	9052	4.42568	0.0219545
GOTERM_BP_FAT	GO:0048663~neuron fate commitment	6	2.12014	0.000947068	HES1, FEZF2, DLX1, BCL11B, SOX2, PAX6	236	30	9052	7.67119	0.0228893
GOTERM_BP_FAT	GO:0001944~vasculature development	19	6.71378	0.0009648	NRP2, MEF2C, EFNB2, PAX6, LEF1, PRKCB, HES1, PRKD1, NOTCH2, ADAMTS6, S1PR1, NUS1, SFRP1, ITGAV, ZFPM2, HDAC9, PLXND1, DDAH1, ACVR1	236	305	9052	2.38939	0.0231775
GOTERM_BP_FAT	GO:0050920~regulation of chemotaxis	9	3.18021	0.00097642	PRKD1, NBL1, FEZF2, S1PR1, PLXNA4, EFNB2, ROBO2, SEMA3A, PLXND1	236	79	9052	4.36966	0.0233179
GOTERM_BP_FAT	GO:0021545~cranial nerve development	5	1.76678	0.00101706	HES1, SLC1A3, PLXNA4, SALL1, SEMA3A	236	18	9052	10.6544	0.0239997
GOTERM_BP_FAT	GO:0001709~cell fate determination	5	1.76678	0.00101706	MEF2C, HES1, NOTCH2, FEZF2, PAX6	236	18	9052	10.6544	0.0239997
GOTERM_BP_FAT	GO:0001568~blood vessel development	18	6.36042	0.0010166	NRP2, MEF2C, EFNB2, PAX6, LEF1, PRKCB, HES1, PRKD1, NOTCH2, ADAMTS6, S1PR1, NUS1, ITGAV, ZFPM2, HDAC9, PLXND1, DDAH1, ACVR1	236	281	9052	2.45696	0.0241268
GOTERM_BP_FAT	GO:0045995~regulation of embryonic development	8	2.82686	0.0010601	TENM4, HES1, CDK1, LAMA3, SFRP1, CCSAP, NFE2L2, PLCB1	236	62	9052	4.94915	0.0248613
GOTERM_BP_FAT	GO:0001657~ureteric bud development	7	2.4735	0.00112765	HES1, SFRP1, FAT4, SALL1, ROBO2, SOX9, SOX8	236	46	9052	5.83677	0.0262762
GOTERM_BP_FAT	GO:0001649~osteoblast differentiation	11	3.88693	0.00116849	MEF2C, PRKD1, SFRP1, PENK, RRAS2, TNC, SOX2, LEF1, LRRC17, SOX8, ACVR1	236	121	9052	3.4869	0.0269119
GOTERM_BP_FAT	GO:0048565~digestive tract development	8	2.82686	0.00116675	HES1, ITGA6, ASS1, SFRP1, FAT4, SALL1, TRPS1, PDGFC	236	63	9052	4.87059	0.0270231
GOTERM_BP_FAT	GO:0072163~mesonephric epithelium development	7	2.4735	0.00126508	HES1, SFRP1, FAT4, SALL1, ROBO2, SOX9, SOX8	236	47	9052	5.71259	0.0287849
GOTERM_BP_FAT	GO:0072164~mesonephric tubule development	7	2.4735	0.00126508	HES1, SFRP1, FAT4, SALL1, ROBO2, SOX9, SOX8	236	47	9052	5.71259	0.0287849
GOTERM_BP_FAT	GO:0048483~autonomic nervous system development	5	1.76678	0.00126225	NRP2, HES1, PLXNA4, SEMA3A, SOX8	236	19	9052	10.0937	0.0288804
GOTERM_BP_FAT	GO:0010721~negative regulation of cell development	14	4.947	0.00134197	HES1, FEZF2, DLX1, EPHA7, GNRH1, SFRP1, PTPRZ1, SALL1, SOX2, PAX6, SEMA3A, SOX9, SOX8, ASPM	236	190	9052	2.82623	0.0303415
GOTERM_BP_FAT	GO:0010038~response to metal ion	14	4.947	0.00134197	MEF2C, KCNC2, VCAM1, CDK1, GNRH1, ASS1, PENK, CPNE6, CLU, CYBRD1, LEF1, CPNE3, PRNP, B2M	236	190	9052	2.82623	0.0303415
GOTERM_BP_FAT	GO:0072091~regulation of stem cell proliferation	7	2.4735	0.00141497	SOX2, PAX6, EIF2AK2, HMGA2, SOX9, ASPM, NFIB	236	48	9052	5.59357	0.0317928
GOTERM_BP_FAT	GO:0001823~mesonephros development	7	2.4735	0.00141497	HES1, SFRP1, FAT4, SALL1, ROBO2, SOX9, SOX8	236	48	9052	5.59357	0.0317928
GOTERM_BP_FAT	GO:0007405~neuroblast proliferation	6	2.12014	0.00148055	EML1, SOX2, PAX6, SOX5, LEF1, ASPM	236	33	9052	6.97381	0.0330632
GOTERM_BP_FAT	GO:0061448~connective tissue development	10	3.53357	0.00169413	MEF2C, WNT5B, TRPS1, SOX5, SOX6, HMGA2, SOX9, SOX8, COL11A1, NFIB	236	106	9052	3.61848	0.0375431
GOTERM_BP_FAT	GO:0060541~respiratory system development	11	3.88693	0.0017895	ATXN1, HES1, RDH10, ASS1, TNC, SOX2, HOPX, LEF1, ZFPM2, SOX9, NFIB	236	128	9052	3.29621	0.0394051
GOTERM_BP_FAT	GO:0045596~negative regulation of cell differentiation	21	7.42049	0.00188453	GNRH1, PTPRZ1, SOX2, PAX6, EOMES, LRRC17, SOX9, SOX8, HES1, NOTCH2, FEZF2, EPHA7, DLX1, SFRP1, ITGAV, SALL1, HOPX, ZFPM2, SEMA3A, NFE2L2, ASPM	236	377	9052	2.13654	0.0412362
GOTERM_BP_FAT	GO:0007492~endoderm development	6	2.12014	0.00194158	LAMA3, ITGAV, SOX2, EOMES, HMGA2, COL11A1	236	35	9052	6.5753	0.0420145
GOTERM_BP_FAT	GO:0000122~negative regulation of transcription from RNA polymerase II promoter	24	8.48057	0.00194095	MEF2C, SOX2, PAX6, EOMES, LEF1, SOX6, HMGA2, ZBTB18, NRIP1, ATXN1, ARX, HES1, FEZF1, NOTCH2, FEZF2, DLX1, EZR, TRPS1, SALL1, HOPX, ZFPM2, HDAC9, NFIA, NFIB	236	461	9052	1.99684	0.0422221
GOTERM_BP_FAT	GO:0055123~digestive system development	8	2.82686	0.00216883	HES1, ITGA6, ASS1, SFRP1, FAT4, SALL1, TRPS1, PDGFC	236	70	9052	4.38354	0.0465772
GOTERM_BP_FAT	GO:0061333~renal tubule morphogenesis	6	2.12014	0.00220779	MEF2C, HES1, FAT4, SALL1, SOX9, SOX8	236	36	9052	6.39266	0.0471498
GOTERM_BP_FAT	GO:0016337~single organismal cell-cell adhesion	19	6.71378	0.0022629	GNRH1, ASS1, EFNB1, SOX2, EFNB2, EOMES, LEF1, SOX9, B2M, VCAM1, HES1, MYO10, EZR, ITGA6, ITGAV, BCL11B, PKP4, PRNP, CDH10	236	329	9052	2.21508	0.0480512
GOTERM_BP_FAT	GO:0002683~negative regulation of immune system process	12	4.24028	0.00231531	HES1, NBL1, EZR, GNRH1, SFRP1, LRRC17, IL33, NFE2L2, EIF2AK2, PLCB1, SOX9, PRNP	236	155	9052	2.96949	0.0488868
GOTERM_BP_FAT	GO:0002250~adaptive immune response	10	3.53357	0.00233142	MEF2C, CLU, EOMES, TFEB, LEF1, IL33, RFTN1, DENND1B, PRKCB, B2M	236	111	9052	3.45549	0.0489687
GOTERM_CC_FAT	GO:0031012~extracellular matrix	20	7.06714	4.73289e-08	MATN2, WNT5B, SPOCK3, SPOCK2, PTPRZ1, TNC, CLU, TIMP2, COL4A6, COL4A5, ADAMTS6, ADAMTS9, SLC1A3, LAMA3, ITGA6, SFRP1, GPC6, CDON, RELN, COL11A1	208	168	8089	4.62969	2.01146e-05
GOTERM_CC_FAT	GO:0005578~proteinaceous extracellular matrix	18	6.36042	9.70823e-08	MATN2, WNT5B, SPOCK3, SPOCK2, PTPRZ1, TNC, TIMP2, COL4A6, COL4A5, ADAMTS6, ADAMTS9, SLC1A3, LAMA3, ITGA6, SFRP1, GPC6, RELN, COL11A1	208	141	8089	4.96461	2.06298e-05
GOTERM_CC_FAT	GO:0005576~extracellular region	86	30.3887	5.67498e-06	NRP2, KIF23, OPCML, LYPD6, CTDSPL, GABRB2, LRRC17, B2M, SLC16A1, SLC1A3, SLK, GPC6, PDGFC, ROBO2, SEMA3A, PLCB1, LGI1, CNTLN, DDAH1, COL11A1, NXPH1, MATN2, CDK1, GATM, EFNB1, COL25A1, RFTN1, PRKCB, ADAMTS6, ADAMTS9, ALDH7A1, CHRDL1, SERPINB6, RRAS2, FRMD4B, PGM1, CYBRD1, RELN, PRNP, NPPA, WNT5B, ASS1, EPDR1, SPOCK3, SPOCK2, TNC, CLU, IL33, LRIG3, TIMP2, ZBTB18, PCSK2, VCAM1, IGSF11, EZR, CRB1, FA…	208	2178	8089	1.53558	0.000803635
GOTERM_CC_FAT	GO:0009986~cell surface	23	8.12721	1.23918e-05	WNT5B, CLU, SPIRE1, TIMP2, B2M, VCAM1, NOTCH2, KCNQ3, S1PR1, SLC1A3, ITGA6, SFRP1, GRIA1, ITGAV, CDON, TMEM123, PCSK9, CNTNAP2, ROBO2, PDGFC, PTGFRN, PRNP, ISLR2	208	309	8089	2.89468	0.00131577
GOTERM_CC_FAT	GO:0005615~extracellular space	28	9.89399	4.82595e-05	WNT5B, SPOCK3, TNC, CLU, LRRC17, LRIG3, IL33, TIMP2, B2M, VCAM1, PCSK2, EZR, GPC6, PCSK9, PDGFC, SEMA3A, LGI1, GNRH1, PTPRZ1, COL25A1, SERPINI1, NBL1, NPY, SERPINB6, SFRP1, FRMD4B, RELN, NPPA	208	464	8089	2.34678	0.00341263
GOTERM_CC_FAT	GO:0044421~extracellular region part	77	27.2085	4.23576e-05	KIF23, OPCML, CTDSPL, GABRB2, LRRC17, B2M, SLC16A1, SLC1A3, SLK, GPC6, PDGFC, ROBO2, SEMA3A, CNTLN, LGI1, PLCB1, DDAH1, COL11A1, MATN2, CDK1, GATM, EFNB1, COL25A1, RFTN1, PRKCB, ADAMTS6, ADAMTS9, ALDH7A1, SERPINB6, RRAS2, FRMD4B, PGM1, CYBRD1, RELN, PRNP, NPPA, WNT5B, ASS1, EPDR1, SPOCK3, SPOCK2, TNC, CLU, IL33, LRIG3, TIMP2, ZBTB18, PCSK2, VCAM1, IGSF11, EZR, FAT4, FAM213A, ITGAV, HS6ST2, PCSK9,…	208	1974	8089	1.51696	0.003594
GOTERM_CC_FAT	GO:0031256~leading edge membrane	11	3.88693	0.000122978	KCNC2, EPB41L3, EZR, SYNE2, PTPRZ1, GRIA1, ITGAV, SNTG1, CNTNAP2, ROBO2, SPATA13	208	93	8089	4.59982	0.00743919
GOTERM_CC_FAT	GO:0044420~extracellular matrix component	10	3.53357	0.000141306	MATN2, LAMA3, SLC1A3, ITGA6, PTPRZ1, TNC, TIMP2, COL11A1, COL4A6, COL4A5	208	77	8089	5.05057	0.00747932
GOTERM_CC_FAT	GO:0098590~plasma membrane region	27	9.54064	0.000202471	KCNC2, SHROOM3, SNCAIP, GABRB2, SLC1A3, EZR, CRB1, ITGAV, CNTNAP2, ROBO2, LRRC7, DLGAP1, GABRA2, CNTNAP4, PTPRZ1, HOMER2, EPB41L3, EPHA7, MYO10, SYNE1, SYNE2, ITGA6, GRIA1, CYBRD1, SNTG1, ABCC4, SPATA13	208	478	8089	2.19668	0.00951653
GOTERM_CC_FAT	GO:0030175~filopodium	9	3.18021	0.000286498	VCAM1, MYO10, EZR, SYNE2, PTPRZ1, ITGAV, SPATA13, LRRC7, FGD4	208	67	8089	5.22395	0.0100969
GOTERM_CC_FAT	GO:0045202~synapse	27	9.54064	0.000246697	MEF2C, KCNC2, CPLX2, SNCAIP, GABRB2, CALB2, SYNPR, SLC1A3, LGI1, LRRC7, CDH23, GABRA2, DLGAP1, CAP2, CNTNAP4, PTPRZ1, EFNB1, HOMER2, COL4A5, ATXN1, EPB41L3, SCGN, EPHA7, SYNE1, PENK, GRIA1, PKP4	208	484	8089	2.16945	0.0104311
GOTERM_CC_FAT	GO:0098589~membrane region	31	10.9541	0.000273703	KCNC2, SHROOM3, SNCAIP, GABRB2, SLC1A3, S1PR1, EZR, CRB1, ITGAV, CNTNAP2, ROBO2, LRRC7, GABRA2, DLGAP1, CNTNAP4, PTPRZ1, EFNB1, RFTN1, HOMER2, EPB41L3, SYNE1, EPHA7, MYO10, SYNE2, ITGA6, GRIA1, CYBRD1, SNTG1, ABCC4, PRNP, SPATA13	208	599	8089	2.01264	0.0105206
GOTERM_CC_FAT	GO:0031252~cell leading edge	18	6.36042	0.000332991	KCNC2, PTPRZ1, GAS7, LRRC16A, EPB41L3, MYO10, SYNE2, EZR, SLK, GRIA1, ITGAV, FRMD4B, SNTG1, CNTNAP2, ROBO2, PLXND1, SPATA13, FGD4	208	259	8089	2.70274	0.010829
GOTERM_CC_FAT	GO:0044297~cell body	19	6.71378	0.000827032	KCNC2, CPLX2, SNCAIP, GNRH1, ASS1, PTPRZ1, CPNE6, TIMP2, HOMER2, PCSK2, RDH10, MYO10, EPHA7, SLC1A3, EZR, PENK, GRIA1, CNTNAP2, FABP7	208	306	8089	2.4147	0.0248039
GOTERM_CC_FAT	GO:0043005~neuron projection	31	10.9541	0.000941458	KCNC2, CPLX2, ASS1, CLU, TIMP2, CALB2, PCSK2, SYNPR, KCNQ3, SLC1A3, CCSAP, BCL11B, CNTNAP2, ROBO2, SEMA3A, LRRC7, GABRA2, GNRH1, CNTNAP4, PTPRZ1, CPNE6, HOMER2, TENM4, EPB41L3, SCGN, EPHA7, MYO10, PENK, GRIA1, RELN, NFIB	208	645	8089	1.8691	0.0263343
GOTERM_CC_FAT	GO:0043025~neuronal cell body	17	6.00707	0.00127639	KCNC2, CPLX2, SNCAIP, GNRH1, ASS1, PTPRZ1, CPNE6, TIMP2, HOMER2, PCSK2, MYO10, EPHA7, SLC1A3, PENK, GRIA1, CNTNAP2, FABP7	208	266	8089	2.48541	0.0314257
GOTERM_CC_FAT	GO:0031253~cell projection membrane	13	4.59364	0.00122135	KCNC2, EPB41L3, MYO10, EZR, SYNE2, PTPRZ1, GRIA1, ITGAV, CYBRD1, SNTG1, CNTNAP2, ROBO2, SPATA13	208	168	8089	3.0093	0.0319407
GOTERM_CC_FAT	GO:0097458~neuron part	36	12.7208	0.00140805	KCNC2, CPLX2, SNCAIP, ASS1, CLU, TIMP2, CALB2, PCSK2, SYNPR, KCNQ3, SLC1A3, CCSAP, BCL11B, CNTNAP2, ROBO2, SEMA3A, LRRC7, CDH23, GABRA2, DLGAP1, CAP2, CNTNAP4, GNRH1, PTPRZ1, CPNE6, HOMER2, TENM4, EPB41L3, SCGN, MYO10, EPHA7, PENK, GRIA1, RELN, FABP7, NFIB	208	814	8089	1.71993	0.0327217
GOTERM_CC_FAT	GO:0098794~postsynapse	16	5.65371	0.00162666	MEF2C, KCNC2, GABRA2, DLGAP1, CAP2, PTPRZ1, GABRB2, HOMER2, ATXN1, EPB41L3, EPHA7, SYNE1, SLC1A3, GRIA1, PKP4, LRRC7	208	247	8089	2.51915	0.0357605
GOTERM_CC_FAT	GO:0097060~synaptic membrane	12	4.24028	0.00194019	KCNC2, EPHA7, DLGAP1, GABRA2, SYNE1, SNCAIP, CNTNAP4, PTPRZ1, GRIA1, GABRB2, HOMER2, LRRC7	208	154	8089	3.03034	0.0404291
GOTERM_CC_FAT	GO:0043204~perikaryon	7	2.4735	0.00220051	PCSK2, KCNC2, GNRH1, ASS1, PENK, CPNE6, CNTNAP2	208	53	8089	5.13634	0.043604
GOTERM_CC_FAT	GO:0032589~neuron projection membrane	5	1.76678	0.0025171	KCNC2, EPB41L3, GRIA1, CNTNAP2, ROBO2	208	23	8089	8.45422	0.0436485
GOTERM_CC_FAT	GO:0044456~synapse part	21	7.42049	0.00236622	MEF2C, KCNC2, GABRA2, DLGAP1, CPLX2, CAP2, SNCAIP, CNTNAP4, GABRB2, PTPRZ1, HOMER2, CALB2, ATXN1, EPB41L3, SYNE1, SYNPR, EPHA7, SLC1A3, GRIA1, PKP4, LRRC7	208	391	8089	2.08869	0.0447339
GOTERM_CC_FAT	GO:0033267~axon part	11	3.88693	0.00249722	KCNC2, EPB41L3, CPLX2, KCNQ3, GNRH1, PENK, GRIA1, CNTNAP2, ROBO2, CALB2, LRRC7	208	136	8089	3.14547	0.045151
GOTERM_CC_FAT	GO:0036477~somatodendritic compartment	22	7.77385	0.00330618	KCNC2, CPLX2, SNCAIP, GNRH1, CNTNAP4, ASS1, PTPRZ1, CPNE6, CLU, TIMP2, HOMER2, PCSK2, MYO10, EPHA7, SLC1A3, PENK, GRIA1, CNTNAP2, RELN, SEMA3A, FABP7, LRRC7	208	431	8089	1.98507	0.0490238
GOTERM_CC_FAT	GO:0005604~basement membrane	7	2.4735	0.00319646	MATN2, LAMA3, ITGA6, TNC, TIMP2, COL4A6, COL4A5	208	57	8089	4.77589	0.0491464
GOTERM_MF_FAT	GO:0001077~transcriptional activator activity, RNA polymerase II core promoter proximal region sequence-specific binding	14	4.947	1.98504e-06	MEF2C, OTX1, SOX2, PAX6, LEF1, HMGA2, SOX9, BCL11B, NEUROD1, ETV1, NEUROD6, TCF4, NFIA, NFIB	215	102	8271	5.28016	0.000383039
GOTERM_MF_FAT	GO:0001228~transcriptional activator activity, RNA polymerase II transcription regulatory region sequence-specific binding	17	6.00707	7.01192e-07	MEF2C, OTX1, SOX2, PAX6, LEF1, HMGA2, SOX9, FEZF2, BCL11B, TRPS1, ETV1, NEUROD1, NFE2L2, NEUROD6, TCF4, NFIA, NFIB	215	142	8271	4.60554	0.000405908
GOTERM_MF_FAT	GO:0000982~transcription factor activity, RNA polymerase II core promoter proximal region sequence-specific binding	17	6.00707	2.94205e-06	MEF2C, OTX1, SOX2, PAX6, LEF1, HMGA2, SOX9, HES1, BCL11B, SALL1, ETV1, NEUROD1, ZFPM2, NEUROD6, TCF4, NFIA, NFIB	215	158	8271	4.13915	0.000425772
GOTERM_MF_FAT	GO:0000981~RNA polymerase II transcription factor activity, sequence-specific DNA binding	24	8.48057	1.53411e-06	MEF2C, OTX1, SOX2, SOX5, PAX6, LEF1, HMGA2, SOX9, SOX8, ARX, HES1, FEZF1, FEZF2, BCL11B, TRPS1, SALL1, ETV1, NEUROD1, ZFPM2, NFE2L2, NEUROD6, TCF4, NFIA, NFIB	215	290	8271	3.1837	0.000444025
GOTERM_MF_FAT	GO:0001067~regulatory region nucleic acid binding	29	10.2473	2.0536e-05	MEF2C, SOX2, SOX5, TFEB, PAX6, SOX6, SOX9, SOX8, ARX, BCL11B, ETV1, TCF4, OTX1, EOMES, LEF1, NEUROG2, HMGA2, NRIP1, FEZF1, HES1, FEZF2, DLX1, TRPS1, SALL1, NEUROD1, NFE2L2, NEUROD6, NFIA, NFIB	215	462	8271	2.41477	0.00197978
GOTERM_MF_FAT	GO:0000975~regulatory region DNA binding	29	10.2473	1.97361e-05	MEF2C, SOX2, SOX5, TFEB, PAX6, SOX6, SOX9, SOX8, ARX, BCL11B, ETV1, TCF4, OTX1, EOMES, LEF1, NEUROG2, HMGA2, NRIP1, FEZF1, HES1, FEZF2, DLX1, TRPS1, SALL1, NEUROD1, NFE2L2, NEUROD6, NFIA, NFIB	215	461	8271	2.42001	0.00228285
GOTERM_MF_FAT	GO:0044212~transcription regulatory region DNA binding	29	10.2473	1.97361e-05	MEF2C, SOX2, SOX5, TFEB, PAX6, SOX6, SOX9, SOX8, ARX, BCL11B, ETV1, TCF4, OTX1, EOMES, LEF1, NEUROG2, HMGA2, NRIP1, FEZF1, HES1, FEZF2, DLX1, TRPS1, SALL1, NEUROD1, NFE2L2, NEUROD6, NFIA, NFIB	215	461	8271	2.42001	0.00228285
GOTERM_MF_FAT	GO:0000976~transcription regulatory region sequence-specific DNA binding	23	8.12721	0.000121903	MEF2C, OTX1, SOX2, PAX6, EOMES, LEF1, SOX9, SOX8, NRIP1, ARX, FEZF1, FEZF2, DLX1, BCL11B, TRPS1, SALL1, ETV1, NEUROD1, NFE2L2, NEUROD6, TCF4, NFIA, NFIB	215	355	8271	2.49241	0.0100331
GOTERM_MF_FAT	GO:0043565~sequence-specific DNA binding	29	10.2473	0.000256673	MEF2C, SOX2, PAX6, SOX6, SOX9, ZBTB18, SOX8, ARX, BCL11B, ETV1, TCF4, OTX1, EOMES, LEF1, NEUROG2, CREB5, HMGA2, NRIP1, FEZF1, HES1, FEZF2, DLX1, TRPS1, SALL1, NEUROD1, NFE2L2, NEUROD6, NFIA, NFIB	215	534	8271	2.08918	0.0184076
GOTERM_MF_FAT	GO:0001012~RNA polymerase II regulatory region DNA binding	20	7.06714	0.000440087	MEF2C, OTX1, PAX6, EOMES, LEF1, SOX8, ARX, FEZF1, FEZF2, DLX1, BCL11B, TRPS1, SALL1, ETV1, NEUROD1, NFE2L2, NEUROD6, TCF4, NFIA, NFIB	215	312	8271	2.46601	0.0210149
GOTERM_MF_FAT	GO:0000977~RNA polymerase II regulatory region sequence-specific DNA binding	20	7.06714	0.000409809	MEF2C, OTX1, PAX6, EOMES, LEF1, SOX8, ARX, FEZF1, FEZF2, DLX1, BCL11B, TRPS1, SALL1, ETV1, NEUROD1, NFE2L2, NEUROD6, TCF4, NFIA, NFIB	215	310	8271	2.48192	0.0213442
GOTERM_MF_FAT	GO:0004872~receptor activity	22	7.77385	0.000340558	NRP2, GPR85, GABRA2, PLXNA4, PTPRZ1, GABRB2, EFNB2, LEF1, NOTCH2, EPHA7, S1PR1, NPY, SFRP1, GRIA1, ITGAV, TMEM123, ROBO2, SCARB2, CNTLN, PLXND1, GPR12, ACVR1	215	356	8271	2.37735	0.0216746
GOTERM_MF_FAT	GO:0038023~signaling receptor activity	18	6.36042	0.000398395	NRP2, GPR85, GABRA2, PLXNA4, PTPRZ1, GABRB2, LEF1, NOTCH2, EPHA7, S1PR1, NPY, SFRP1, GRIA1, ROBO2, CNTLN, PLXND1, GPR12, ACVR1	215	260	8271	2.66329	0.0228076
GOTERM_MF_FAT	GO:0000978~RNA polymerase II core promoter proximal region sequence-specific DNA binding	14	4.947	0.000658739	MEF2C, OTX1, PAX6, LEF1, FEZF1, FEZF2, BCL11B, SALL1, ETV1, NEUROD1, NEUROD6, TCF4, NFIA, NFIB	215	177	8271	3.04281	0.0268846
GOTERM_MF_FAT	GO:0005509~calcium ion binding	20	7.06714	0.00062842	GPD2, MATN2, DCHS2, SPOCK3, EPDR1, PCDH11Y, SPOCK2, CPNE6, CALB2, NOTCH2, SCGN, CDH20, EML1, CRB1, FAT4, VSNL1, PLCB1, CDH10, GCA, CDH23	215	321	8271	2.39687	0.0276094
GOTERM_MF_FAT	GO:0000987~core promoter proximal region sequence-specific DNA binding	14	4.947	0.000946978	MEF2C, OTX1, PAX6, LEF1, FEZF1, FEZF2, BCL11B, SALL1, ETV1, NEUROD1, NEUROD6, TCF4, NFIA, NFIB	215	184	8271	2.92705	0.03591
GOTERM_MF_FAT	GO:0001159~core promoter proximal region DNA binding	14	4.947	0.000946978	MEF2C, OTX1, PAX6, LEF1, FEZF1, FEZF2, BCL11B, SALL1, ETV1, NEUROD1, NEUROD6, TCF4, NFIA, NFIB	215	184	8271	2.92705	0.03591
GOTERM_MF_FAT	GO:0003700~transcription factor activity, sequence-specific DNA binding	31	10.9541	0.00125875	MEF2C, SOX2, SOX5, TFEB, PAX6, SOX6, SOX9, ZBTB18, SOX8, ARX, BCL11B, ETV1, TCF4, OTX1, EOMES, LEF1, RCAN1, CREB5, HMGA2, GAS7, FEZF1, HES1, FEZF2, TRPS1, SALL1, NEUROD1, ZFPM2, NFE2L2, NEUROD6, NFIA, NFIB	215	649	8271	1.83754	0.0445565
GOTERM_MF_FAT	GO:0001071~nucleic acid binding transcription factor activity	31	10.9541	0.00125875	MEF2C, SOX2, SOX5, TFEB, PAX6, SOX6, SOX9, ZBTB18, SOX8, ARX, BCL11B, ETV1, TCF4, OTX1, EOMES, LEF1, RCAN1, CREB5, HMGA2, GAS7, FEZF1, HES1, FEZF2, TRPS1, SALL1, NEUROD1, ZFPM2, NFE2L2, NEUROD6, NFIA, NFIB	215	649	8271	1.83754	0.0445565

## Sheet: GO_downregulated
Category	Term	Count	%	PValue	Genes	List Total	Pop Hits	Pop Total	Fold Enrichment	Benjamini
GOTERM_BP_FAT	GO:0007399~nervous system development	92	34.2007	7.90974e-20	ADCY1, ADCY6, FGF11, L1CAM, PAX3, LRRC4C, JAG1, KLHL1, EDNRB, GPC2, NDUFS4, OLIG3, CXCR4, SEMA3F, PAX7, RAPGEF5, CDK5RAP3, POU4F1, UNC5C, ROBO3, NR2F2, NRG1, TUBB3, NR2F1, INA, ANKS1A, KIF5A, MDGA1, DLL1, HES6, WLS, RND2, CBLN1, CNTN2, TFAP2B, BIN1, SMARCA4, KALRN, NRBP2, MYL6, DCC, IRX3, IRX5, FGFR3, PFKFB3, TH, BRSK2, MEIS1, TAGLN3, ADCYAP1, APLP1, PCDHAC1, IGF1R, SEMA5B, RGMB, NDRG4, COL6A2, A…	212	1527	9052	2.57251	2.64423e-16
GOTERM_BP_FAT	GO:0048699~generation of neurons	69	25.6506	4.76045e-16	ADCY1, ADCY6, L1CAM, LRRC4C, JAG1, PAX3, KLHL1, EDNRB, GPC2, OLIG3, CXCR4, SEMA3F, PAX7, CDK5RAP3, POU4F1, UNC5C, ROBO3, NR2F2, NRG1, TUBB3, NR2F1, ANKS1A, KIF5A, MDGA1, DLL1, RND2, CBLN1, CNTN2, BIN1, NRBP2, KALRN, MYL6, DCC, IRX3, FGFR3, IRX5, TH, BRSK2, MEIS1, ADCYAP1, SEMA5B, RGMB, NDRG4, COL6A2, DCLK2, COL6A1, POU3F2, HS6ST1, AGRN, DNMT3B, FN1, COL4A2, DPYSL4, ZNF521, EPHA3, CDKN1C, LRP1, SE…	212	1046	9052	2.81661	7.42295e-13
GOTERM_BP_FAT	GO:0030182~neuron differentiation	65	24.1636	3.11963e-15	ADCY1, ADCY6, L1CAM, LRRC4C, JAG1, PAX3, KLHL1, EDNRB, GPC2, OLIG3, CXCR4, SEMA3F, PAX7, POU4F1, UNC5C, ROBO3, NRG1, TUBB3, ANKS1A, KIF5A, MDGA1, DLL1, RND2, CBLN1, CNTN2, NRBP2, KALRN, MYL6, DCC, IRX3, FGFR3, IRX5, TH, BRSK2, MEIS1, ADCYAP1, SEMA5B, RGMB, NDRG4, COL6A2, DCLK2, COL6A1, POU3F2, HS6ST1, AGRN, DNMT3B, FN1, COL4A2, DPYSL4, ZNF521, EPHA3, CDKN1C, LRP1, SEMA6C, PLK2, ID2, ID1, TENM2, P…	212	975	9052	2.84654	3.46401e-12
GOTERM_BP_FAT	GO:0022008~neurogenesis	69	25.6506	4.91197e-15	ADCY1, ADCY6, L1CAM, LRRC4C, JAG1, PAX3, KLHL1, EDNRB, GPC2, OLIG3, CXCR4, SEMA3F, PAX7, CDK5RAP3, POU4F1, UNC5C, ROBO3, NR2F2, NRG1, TUBB3, NR2F1, ANKS1A, KIF5A, MDGA1, DLL1, RND2, CBLN1, CNTN2, BIN1, NRBP2, KALRN, MYL6, DCC, IRX3, FGFR3, IRX5, TH, BRSK2, MEIS1, ADCYAP1, SEMA5B, RGMB, NDRG4, COL6A2, DCLK2, COL6A1, POU3F2, HS6ST1, AGRN, DNMT3B, FN1, COL4A2, DPYSL4, ZNF521, EPHA3, CDKN1C, LRP1, SE…	212	1094	9052	2.69303	4.08262e-12
GOTERM_BP_FAT	GO:0007417~central nervous system development	42	15.6134	1.71204e-10	DCC, FGFR3, PFKFB3, TH, PAX3, TAGLN3, ADCYAP1, KLHL1, IGF1R, NDUFS4, OLIG3, CXCR4, NDRG4, SEMA3F, PAX7, DCLK2, ACTL6B, POU3F2, POU4F1, CDK5RAP3, UNC5C, NR2F2, NRG1, NR2F1, INA, DMBX1, NES, RFX4, MDGA1, DLL1, WLS, PCDH18, CBLN1, LRP1, ID2, ID1, NTRK2, CNTN2, NHLH2, LRP2, BIN1, RERE	212	591	9052	3.03438	1.14467e-07
GOTERM_BP_FAT	GO:0048666~neuron development	49	18.2156	1.40666e-09	ADCY1, ADCY6, L1CAM, LRRC4C, KLHL1, EDNRB, CXCR4, SEMA3F, POU4F1, ROBO3, UNC5C, NRG1, TUBB3, ANKS1A, KIF5A, RND2, CNTN2, KALRN, DCC, MYL6, FGFR3, IRX5, TH, BRSK2, ADCYAP1, SEMA5B, RGMB, NDRG4, COL6A2, DCLK2, COL6A1, HS6ST1, POU3F2, AGRN, FN1, COL4A2, DPYSL4, EPHA3, CDKN1C, LRP1, SEMA6C, PLK2, ID1, TENM2, NTRK2, PRICKLE2, GFRA1, MAP6, RERE	212	823	9052	2.54217	6.71778e-07
GOTERM_BP_FAT	GO:0051960~regulation of nervous system development	36	13.3829	1.38558e-09	DCC, IRX3, FGFR3, ADCY6, L1CAM, JAG1, LRRC4C, MEIS1, ADCYAP1, EDNRB, SEMA5B, CXCR4, NDRG4, SEMA3F, POU3F2, POU4F1, CDK5RAP3, AGRN, NRG1, DNMT3B, FN1, RFX4, DLL1, EPHA3, RND2, CBLN1, SEMA6C, LRP1, ID2, PLK2, ID1, NTRK2, CNTN2, PBX1, BIN1, TCF12	212	482	9052	3.18907	7.71997e-07
GOTERM_BP_FAT	GO:0050767~regulation of neurogenesis	33	12.2677	5.97237e-09	DCC, IRX3, FGFR3, ADCY6, L1CAM, JAG1, LRRC4C, MEIS1, ADCYAP1, EDNRB, SEMA5B, CXCR4, NDRG4, SEMA3F, POU3F2, POU4F1, CDK5RAP3, NRG1, DNMT3B, FN1, DLL1, EPHA3, RND2, SEMA6C, LRP1, ID2, PLK2, ID1, NTRK2, CNTN2, PBX1, BIN1, TCF12	212	436	9052	3.23174	2.4957e-06
GOTERM_BP_FAT	GO:0045664~regulation of neuron differentiation	30	11.1524	6.88898e-09	DCC, IRX3, ADCY6, L1CAM, JAG1, LRRC4C, MEIS1, ADCYAP1, EDNRB, SEMA5B, NDRG4, SEMA3F, POU3F2, CDK5RAP3, NRG1, DNMT3B, FN1, DLL1, EPHA3, RND2, SEMA6C, LRP1, ID2, PLK2, ID1, NTRK2, CNTN2, PBX1, BIN1, TCF12	212	368	9052	3.48082	2.55887e-06
GOTERM_BP_FAT	GO:0007420~brain development	33	12.2677	1.86275e-08	FGFR3, PFKFB3, TH, ADCYAP1, KLHL1, IGF1R, NDUFS4, CXCR4, NDRG4, DCLK2, POU3F2, CDK5RAP3, POU4F1, UNC5C, NR2F2, NRG1, NR2F1, DMBX1, INA, NES, RFX4, MDGA1, DLL1, WLS, PCDH18, CBLN1, LRP1, ID2, ID1, NTRK2, CNTN2, LRP2, RERE	212	457	9052	3.08323	5.66105e-06
GOTERM_BP_FAT	GO:0040011~locomotion	53	19.7026	1.77831e-08	RARRES2, L1CAM, JAG1, PAX3, CITED2, EDNRB, TRIM8, OLIG3, CXCR4, SEMA3F, POU4F1, ROBO3, UNC5C, NR2F2, NRG1, TUBB3, NR2F1, ANKS1A, KIF5A, PDPN, PTPRG, MDGA1, DDR1, CNTN2, SRGAP3, KALRN, DCC, MYL6, FGFR3, APC2, ENPP2, HSPA1A, SEMA5B, IGF1R, RGMB, NDRG4, COL6A2, COL6A1, POU3F2, AGRN, FN1, SCG2, COL4A2, LMNA, DPYSL4, EPHA3, LRP1, SEMA6C, ID1, TENM2, NTRK2, GFRA1, RERE	212	1008	9052	2.24504	5.94488e-06
GOTERM_BP_FAT	GO:0048468~cell development	63	23.4201	3.59735e-08	ADCY1, ADCY6, L1CAM, LRRC4C, JAG1, PAX3, KLHL1, EDNRB, TRIM8, CXCR4, SEMA3F, CDK5RAP3, POU4F1, UNC5C, ROBO3, NRG1, TUBB3, ANKS1A, KIF5A, DLL1, RND2, CNTN2, BIN1, SMARCA4, KALRN, MYL6, DCC, IRX3, FGFR3, IRX5, TH, BRSK2, MEIS1, ADCYAP1, SEMA5B, RGMB, NDRG4, COL6A2, DCLK2, COL6A1, POU3F2, HS6ST1, AGRN, DNMT3B, FN1, COL4A2, LMNA, DPYSL4, EPHA3, CDKN1C, LRP1, SEMA6C, PLK2, ID2, ID1, TENM2, PRICKLE2, N…	212	1344	9052	2.00147	1.00216e-05
GOTERM_BP_FAT	GO:0051961~negative regulation of nervous system development	20	7.43494	4.48332e-08	DCC, IRX3, FGFR3, RFX4, ADCY6, DLL1, JAG1, MEIS1, ADCYAP1, SEMA5B, EDNRB, LRP1, SEMA6C, PLK2, ID2, ID1, SEMA3F, CNTN2, PBX1, NRG1	212	183	9052	4.66646	1.1529e-05
GOTERM_BP_FAT	GO:0060322~head development	33	12.2677	6.25095e-08	FGFR3, PFKFB3, TH, ADCYAP1, KLHL1, IGF1R, NDUFS4, CXCR4, NDRG4, DCLK2, POU3F2, CDK5RAP3, POU4F1, UNC5C, NR2F2, NRG1, NR2F1, DMBX1, INA, NES, RFX4, MDGA1, DLL1, WLS, PCDH18, CBLN1, LRP1, ID2, ID1, NTRK2, CNTN2, LRP2, RERE	212	481	9052	2.92939	1.49263e-05
GOTERM_BP_FAT	GO:0050768~negative regulation of neurogenesis	19	7.0632	6.95202e-08	DCC, IRX3, FGFR3, ADCY6, DLL1, JAG1, MEIS1, ADCYAP1, SEMA5B, EDNRB, LRP1, SEMA6C, PLK2, ID2, ID1, SEMA3F, CNTN2, PBX1, NRG1	212	169	9052	4.80038	1.54936e-05
GOTERM_BP_FAT	GO:0006928~movement of cell or subcellular component	54	20.0743	1.48815e-07	KIFC2, RARRES2, L1CAM, JAG1, PAX3, CITED2, EDNRB, OLIG3, CXCR4, SEMA3F, POU4F1, ROBO3, UNC5C, NR2F2, NRG1, TUBB3, NR2F1, ANKS1A, KIF5A, PDPN, PTPRG, MDGA1, DDR1, CNTN2, SRGAP3, KALRN, DCC, MYL6, FGFR3, APC2, ENPP2, TPM2, SEMA5B, IGF1R, RGMB, TUBB, NDRG4, COL6A2, COL6A1, POU3F2, AGRN, FN1, SCG2, COL4A2, LMNA, DPYSL4, EPHA3, LRP1, SEMA6C, ID1, TENM2, NTRK2, GFRA1, RERE	212	1106	9052	2.08472	3.10926e-05
GOTERM_BP_FAT	GO:0060284~regulation of cell development	33	12.2677	3.27801e-07	DCC, IRX3, FGFR3, ADCY6, L1CAM, JAG1, LRRC4C, MEIS1, ADCYAP1, EDNRB, SEMA5B, CXCR4, NDRG4, SEMA3F, POU3F2, POU4F1, CDK5RAP3, NRG1, DNMT3B, FN1, DLL1, EPHA3, RND2, SEMA6C, LRP1, ID2, PLK2, ID1, NTRK2, CNTN2, PBX1, BIN1, TCF12	212	517	9052	2.72541	6.44591e-05
GOTERM_BP_FAT	GO:2000026~regulation of multicellular organismal development	45	16.7286	4.42151e-07	DCC, IRX3, FGFR3, ENPP2, ADCY6, L1CAM, JAG1, LRRC4C, PAX3, MEIS1, LGR4, ADCYAP1, CITED2, SEMA5B, EDNRB, CXCR4, NDRG4, SEMA3F, POU3F2, POU4F1, CDK5RAP3, AGRN, FBN2, NRG1, DNMT3B, FN1, COL4A2, RFX4, LMNA, DLL1, EPHA3, RND2, CBLB, CBLN1, LRP1, SEMA6C, PLK2, ID2, ID1, NTRK2, PRICKLE2, CNTN2, PBX1, BIN1, TCF12	212	865	9052	2.22129	7.39029e-05
GOTERM_BP_FAT	GO:0045665~negative regulation of neuron differentiation	16	5.94796	4.25085e-07	DCC, IRX3, ADCY6, DLL1, JAG1, MEIS1, SEMA5B, EDNRB, LRP1, SEMA6C, PLK2, ID2, ID1, SEMA3F, CNTN2, PBX1	212	133	9052	5.13662	7.47899e-05
GOTERM_BP_FAT	GO:0031175~neuron projection development	41	15.2416	4.74602e-07	DCC, MYL6, ADCY1, FGFR3, ADCY6, BRSK2, L1CAM, LRRC4C, ADCYAP1, KLHL1, SEMA5B, RGMB, NDRG4, SEMA3F, COL6A2, COL6A1, POU3F2, POU4F1, AGRN, UNC5C, ROBO3, NRG1, TUBB3, FN1, COL4A2, KIF5A, DPYSL4, EPHA3, RND2, SEMA6C, LRP1, PLK2, ID1, TENM2, NTRK2, PRICKLE2, CNTN2, GFRA1, MAP6, RERE, KALRN	212	749	9052	2.33728	7.55493e-05
GOTERM_BP_FAT	GO:0010721~negative regulation of cell development	19	7.0632	4.14464e-07	DCC, IRX3, FGFR3, ADCY6, DLL1, JAG1, MEIS1, ADCYAP1, SEMA5B, EDNRB, LRP1, SEMA6C, PLK2, ID2, ID1, SEMA3F, CNTN2, PBX1, NRG1	212	190	9052	4.26981	7.69723e-05
GOTERM_BP_FAT	GO:0045595~regulation of cell differentiation	45	16.7286	5.19364e-07	DCC, IRX3, RARRES2, FGFR3, APC2, ADCY6, L1CAM, JAG1, LRRC4C, MEIS1, ADCYAP1, SEMA5B, EDNRB, FNDC5, TRIM8, CXCR4, NDRG4, SEMA3F, SMOC1, PAX7, POU3F2, POU4F1, CDK5RAP3, FBN2, NRG1, BOC, OLFM2, DNMT3B, FN1, LMNA, DLL1, EPHA3, RND2, LRP1, SEMA6C, PLK2, ID2, ID1, NTRK2, CNTN2, TFAP2B, PBX1, C1QL4, BIN1, TCF12	212	870	9052	2.20852	7.89166e-05
GOTERM_BP_FAT	GO:0048870~cell motility	38	14.1264	1.01649e-06	DCC, RARRES2, APC2, ENPP2, L1CAM, JAG1, PAX3, CITED2, EDNRB, SEMA5B, IGF1R, OLIG3, CXCR4, NDRG4, SEMA3F, POU3F2, POU4F1, ROBO3, UNC5C, NR2F2, NRG1, NR2F1, SCG2, FN1, ANKS1A, PTPRG, PDPN, MDGA1, LMNA, EPHA3, DDR1, SEMA6C, LRP1, ID1, NTRK2, CNTN2, SRGAP3, RERE	212	684	9052	2.37212	0.000147733
GOTERM_BP_FAT	GO:0051674~localization of cell	38	14.1264	1.01649e-06	DCC, RARRES2, APC2, ENPP2, L1CAM, JAG1, PAX3, CITED2, EDNRB, SEMA5B, IGF1R, OLIG3, CXCR4, NDRG4, SEMA3F, POU3F2, POU4F1, ROBO3, UNC5C, NR2F2, NRG1, NR2F1, SCG2, FN1, ANKS1A, PTPRG, PDPN, MDGA1, LMNA, EPHA3, DDR1, SEMA6C, LRP1, ID1, NTRK2, CNTN2, SRGAP3, RERE	212	684	9052	2.37212	0.000147733
GOTERM_BP_FAT	GO:0007166~cell surface receptor signaling pathway	62	23.0483	2.26924e-06	ADCY1, LZTS2, ADCY6, L1CAM, JAG1, LRRC4C, LGR4, CITED2, EDNRB, GPC2, TRIM8, CXCR4, HTRA1, SEMA3F, UNC5C, NRG1, ANKS1A, CSNK1G2, PTPRG, TLE3, DLL1, WLS, DDR1, SKOR1, SKOR2, CNTN2, TFAP2B, SMARCA4, KALRN, DCC, MYL6, FGFR3, APC2, HSPA1A, CDC37, ADCYAP1, SEMA5B, IGF1R, RGMB, NDRG4, FBN2, MTMR4, ZNF423, SCG2, DTX4, RFX4, ATP1A3, LMNA, GRIA4, MAPK10, RALGDS, EPHA3, CDKN1C, CBLB, LRP1, SEMA6C, ID1, P2RX…	212	1473	9052	1.79721	0.000316037
GOTERM_BP_FAT	GO:0048667~cell morphogenesis involved in neuron differentiation	32	11.8959	2.6634e-06	DCC, MYL6, ADCY1, FGFR3, BRSK2, L1CAM, SEMA5B, RGMB, SEMA3F, COL6A2, COL6A1, POU4F1, AGRN, ROBO3, UNC5C, NRG1, TUBB3, FN1, COL4A2, KIF5A, DPYSL4, EPHA3, RND2, SEMA6C, ID1, TENM2, NTRK2, CNTN2, GFRA1, MAP6, RERE, KALRN	212	541	9052	2.52558	0.000356086
GOTERM_BP_FAT	GO:0016477~cell migration	34	12.6394	3.70683e-06	DCC, RARRES2, APC2, ENPP2, L1CAM, PAX3, CITED2, EDNRB, SEMA5B, IGF1R, OLIG3, CXCR4, NDRG4, SEMA3F, POU3F2, POU4F1, ROBO3, NR2F2, NRG1, NR2F1, FN1, SCG2, ANKS1A, PTPRG, MDGA1, EPHA3, DDR1, SEMA6C, LRP1, ID1, NTRK2, CNTN2, SRGAP3, RERE	212	606	9052	2.3956	0.0004765
GOTERM_BP_FAT	GO:0007610~behavior	26	9.66543	4.47392e-06	SNCG, RARRES2, ADCY1, TH, MEIS1, KLHL1, ADCYAP1, SEMA5B, CXCR4, NDRG4, SEMA3F, APBA2, AUTS2, POU4F1, NRG1, OLFM2, FN1, SCG2, DMBX1, ATP1A3, SEMA6C, ID2, PLK2, P2RX3, NTRK2, CNTN2	212	393	9052	2.82481	0.000515603
GOTERM_BP_FAT	GO:0048663~neuron fate commitment	8	2.97398	4.36765e-06	OLIG3, ID2, PAX7, POU4F1, ZNF521, DLL1, PAX3, NRG1	212	30	9052	11.3862	0.000521331
GOTERM_BP_FAT	GO:0009887~organ morphogenesis	29	10.7807	4.25672e-06	IRX3, IRX5, FGFR3, IRX2, TH, IRX1, JAG1, PAX3, MEIS1, LGR4, CITED2, APLP1, IGF1R, NDRG4, HTRA1, PAX7, POU4F1, FBN2, NRG1, THBS3, TLE3, DLL1, DDR1, ID2, ID1, PRICKLE2, NTRK2, TFAP2B, PBX1	212	471	9052	2.62897	0.000526907
GOTERM_BP_FAT	GO:0042330~taxis	29	10.7807	5.42394e-06	DCC, MYL6, RARRES2, FGFR3, ENPP2, L1CAM, EDNRB, SEMA5B, RGMB, CXCR4, SEMA3F, COL6A2, COL6A1, AGRN, ROBO3, UNC5C, NRG1, TUBB3, FN1, SCG2, COL4A2, KIF5A, DPYSL4, EPHA3, SEMA6C, TENM2, CNTN2, GFRA1, KALRN	212	477	9052	2.5959	0.000604226
GOTERM_BP_FAT	GO:0006935~chemotaxis	29	10.7807	5.42394e-06	DCC, MYL6, RARRES2, FGFR3, ENPP2, L1CAM, EDNRB, SEMA5B, RGMB, CXCR4, SEMA3F, COL6A2, COL6A1, AGRN, ROBO3, UNC5C, NRG1, TUBB3, FN1, SCG2, COL4A2, KIF5A, DPYSL4, EPHA3, SEMA6C, TENM2, CNTN2, GFRA1, KALRN	212	477	9052	2.5959	0.000604226
GOTERM_BP_FAT	GO:0007409~axonogenesis	29	10.7807	8.355e-06	DCC, MYL6, ADCY1, FGFR3, BRSK2, L1CAM, SEMA5B, RGMB, SEMA3F, COL6A2, COL6A1, POU4F1, AGRN, ROBO3, UNC5C, NRG1, TUBB3, FN1, COL4A2, KIF5A, DPYSL4, EPHA3, RND2, SEMA6C, TENM2, NTRK2, CNTN2, GFRA1, KALRN	212	488	9052	2.53739	0.00090059
GOTERM_BP_FAT	GO:0048812~neuron projection morphogenesis	32	11.8959	8.66559e-06	DCC, MYL6, ADCY1, FGFR3, BRSK2, L1CAM, SEMA5B, RGMB, SEMA3F, COL6A2, COL6A1, POU4F1, AGRN, ROBO3, UNC5C, NRG1, TUBB3, FN1, COL4A2, KIF5A, DPYSL4, EPHA3, RND2, SEMA6C, ID1, TENM2, NTRK2, CNTN2, GFRA1, MAP6, RERE, KALRN	212	573	9052	2.38454	0.000904878
GOTERM_BP_FAT	GO:0061564~axon development	29	10.7807	1.46968e-05	DCC, MYL6, ADCY1, FGFR3, BRSK2, L1CAM, SEMA5B, RGMB, SEMA3F, COL6A2, COL6A1, POU4F1, AGRN, ROBO3, UNC5C, NRG1, TUBB3, FN1, COL4A2, KIF5A, DPYSL4, EPHA3, RND2, SEMA6C, TENM2, NTRK2, CNTN2, GFRA1, KALRN	212	503	9052	2.46172	0.00148774
GOTERM_BP_FAT	GO:0000904~cell morphogenesis involved in differentiation	34	12.6394	2.36771e-05	DCC, MYL6, ADCY1, FGFR3, BRSK2, L1CAM, LRRC4C, SEMA5B, RGMB, SEMA3F, COL6A2, COL6A1, POU3F2, POU4F1, AGRN, ROBO3, UNC5C, NRG1, TUBB3, FN1, COL4A2, KIF5A, DPYSL4, EPHA3, RND2, SEMA6C, ID1, TENM2, NTRK2, CNTN2, GFRA1, MAP6, RERE, KALRN	212	662	9052	2.19295	0.00232533
GOTERM_BP_FAT	GO:0072070~loop of Henle development	5	1.85874	3.29865e-05	IRX3, IRX2, IRX1, DLL1, JAG1	212	9	9052	23.7212	0.00314577
GOTERM_BP_FAT	GO:0019932~second-messenger-mediated signaling	12	4.46097	3.40069e-05	EDNRB, ADCY1, NDUFS4, CXCR4, P2RX3, TENM2, NTRK2, ADCY6, L1CAM, NRG1, DDAH2, ADCYAP1	212	106	9052	4.83375	0.00315299
GOTERM_BP_FAT	GO:0045165~cell fate commitment	12	4.46097	4.41585e-05	FGFR3, OLIG3, APC2, ID2, PAX7, POU4F1, ZNF521, DLL1, PAX3, JAG1, NRG1, NR2F2	212	109	9052	4.70071	0.00398192
GOTERM_BP_FAT	GO:0050770~regulation of axonogenesis	12	4.46097	6.68895e-05	RND2, DCC, SEMA5B, SEMA6C, SEMA3F, NTRK2, CNTN2, L1CAM, POU3F2, LRRC4C, NRG1, FN1	212	114	9052	4.49454	0.00586743
GOTERM_BP_FAT	GO:0007411~axon guidance	23	8.55019	7.30838e-05	MYL6, DCC, COL4A2, FGFR3, KIF5A, DPYSL4, L1CAM, EPHA3, SEMA5B, RGMB, SEMA6C, TENM2, SEMA3F, COL6A2, CNTN2, COL6A1, GFRA1, AGRN, UNC5C, ROBO3, NRG1, TUBB3, KALRN	212	380	9052	2.58436	0.00608958
GOTERM_BP_FAT	GO:0097485~neuron projection guidance	23	8.55019	7.30838e-05	MYL6, DCC, COL4A2, FGFR3, KIF5A, DPYSL4, L1CAM, EPHA3, SEMA5B, RGMB, SEMA6C, TENM2, SEMA3F, COL6A2, CNTN2, COL6A1, GFRA1, AGRN, UNC5C, ROBO3, NRG1, TUBB3, KALRN	212	380	9052	2.58436	0.00608958
GOTERM_BP_FAT	GO:0072080~nephron tubule development	8	2.97398	7.23562e-05	IRX3, IRX2, IRX1, TFAP2B, DLL1, PBX1, JAG1, LGR4	212	45	9052	7.59078	0.00618325
GOTERM_BP_FAT	GO:0006357~regulation of transcription from RNA polymerase II promoter	45	16.7286	7.90233e-05	FGFR3, CHCHD2, JAG1, PAX3, TAGLN3, MEIS1, ADCYAP1, CITED2, EDNRB, RGMB, OLIG3, HTRA1, PAX7, ACTL6B, AUTS2, POU3F2, POU4F1, CDK5RAP3, AGRN, NR2F2, NRG1, DNMT3B, NR2F1, ZNF423, ENO1, DMBX1, RFX4, LMNA, DLL1, HES6, CDKN1C, SKOR1, SKOR2, DUSP26, ID2, ID1, ZMIZ2, TENM2, EBF1, TFAP2B, NHLH2, PBX1, TCF12, RERE, SMARCA4	212	1057	9052	1.8178	0.00642283
GOTERM_BP_FAT	GO:0061326~renal tubule development	8	2.97398	8.36747e-05	IRX3, IRX2, IRX1, TFAP2B, DLL1, PBX1, JAG1, LGR4	212	46	9052	7.42576	0.00648438
GOTERM_BP_FAT	GO:0010975~regulation of neuron projection development	19	7.0632	8.35693e-05	DCC, ADCY6, L1CAM, LRRC4C, EPHA3, ADCYAP1, RND2, SEMA5B, LRP1, SEMA6C, PLK2, NDRG4, ID1, SEMA3F, NTRK2, CNTN2, POU3F2, NRG1, FN1	212	278	9052	2.91822	0.00662992
GOTERM_BP_FAT	GO:0048858~cell projection morphogenesis	35	13.0112	9.68386e-05	DCC, MYL6, ADCY1, FGFR3, ENPP2, BRSK2, L1CAM, SEMA5B, RGMB, SEMA3F, COL6A2, COL6A1, POU4F1, AGRN, ROBO3, UNC5C, NRG1, TUBB3, FN1, NES, COL4A2, RFX4, KIF5A, DPYSL4, EPHA3, RND2, SEMA6C, ID1, TENM2, NTRK2, CNTN2, GFRA1, MAP6, RERE, KALRN	212	742	9052	2.01406	0.00733088
GOTERM_BP_FAT	GO:0030030~cell projection organization	44	16.3569	0.000108573	DCC, MYL6, ADCY1, FGFR3, ENPP2, ADCY6, BRSK2, L1CAM, LRRC4C, ADCYAP1, KLHL1, SEMA5B, RGMB, NDRG4, SEMA3F, COL6A2, COL6A1, POU3F2, POU4F1, AGRN, UNC5C, ROBO3, NRG1, TUBB3, FN1, NES, COL4A2, RFX4, KIF5A, DPYSL4, EPHA3, RND2, LRP1, SEMA6C, PLK2, ID1, TENM2, NTRK2, PRICKLE2, CNTN2, GFRA1, MAP6, RERE, KALRN	212	1038	9052	1.80994	0.00803375
GOTERM_BP_FAT	GO:0030900~forebrain development	17	6.3197	0.000111078	FGFR3, RFX4, MDGA1, TH, ADCYAP1, LRP1, ID2, CXCR4, NTRK2, CNTN2, DCLK2, POU4F1, POU3F2, NRG1, NR2F2, LRP2, NR2F1	212	234	9052	3.102	0.00804045
GOTERM_BP_FAT	GO:0031344~regulation of cell projection organization	22	8.17844	0.000147257	DCC, ENPP2, ADCY6, L1CAM, LRRC4C, ADCYAP1, EPHA3, RND2, SEMA5B, LRP1, SEMA6C, PLK2, NDRG4, ID1, TENM2, SEMA3F, NTRK2, CNTN2, POU3F2, AGRN, NRG1, FN1	212	371	9052	2.53196	0.0104201
GOTERM_BP_FAT	GO:0032990~cell part morphogenesis	35	13.0112	0.000150419	DCC, MYL6, ADCY1, FGFR3, ENPP2, BRSK2, L1CAM, SEMA5B, RGMB, SEMA3F, COL6A2, COL6A1, POU4F1, AGRN, ROBO3, UNC5C, NRG1, TUBB3, FN1, NES, COL4A2, RFX4, KIF5A, DPYSL4, EPHA3, RND2, SEMA6C, ID1, TENM2, NTRK2, CNTN2, GFRA1, MAP6, RERE, KALRN	212	759	9052	1.96895	0.0104221
GOTERM_BP_FAT	GO:0003002~regionalization	14	5.20446	0.000155099	IRX3, RFX4, IRX2, IRX1, DLL1, PCDH8, PAX3, WLS, CITED2, PAX7, SEMA3F, PBX1, NR2F2, NR2F1	212	169	9052	3.53712	0.0105266
GOTERM_BP_FAT	GO:0072009~nephron epithelium development	8	2.97398	0.00016399	IRX3, IRX2, IRX1, TFAP2B, DLL1, PBX1, JAG1, LGR4	212	51	9052	6.69774	0.0109054
GOTERM_BP_FAT	GO:0051094~positive regulation of developmental process	30	11.1524	0.000179299	IRX3, RARRES2, FGFR3, ENPP2, L1CAM, JAG1, LGR4, CITED2, ADCYAP1, FNDC5, CXCR4, NDRG4, POU3F2, AGRN, FBN2, NRG1, BOC, DNMT3B, OLFM2, FN1, LMNA, DLL1, EPHA3, RND2, CBLB, CBLN1, ID2, NTRK2, BIN1, TCF12	212	610	9052	2.09991	0.0114617
GOTERM_BP_FAT	GO:0051241~negative regulation of multicellular organismal process	26	9.66543	0.000177223	DCC, IRX3, COL4A2, FGFR3, RFX4, PTPRG, ADCY6, LMNA, DLL1, JAG1, MEIS1, LGR4, ADCYAP1, SEMA5B, EDNRB, LRP1, SEMA6C, PLK2, ID2, ID1, SEMA3F, CNTN2, PBX1, NR2F2, NRG1, FN1	212	490	9052	2.26561	0.0115506
GOTERM_BP_FAT	GO:0048729~tissue morphogenesis	20	7.43494	0.000203275	IRX3, FGFR3, IRX5, IRX2, IRX1, DLL1, PCDH8, JAG1, WLS, PAX3, LGR4, DDR1, IGF1R, NDRG4, PAX7, PRICKLE2, TFAP2B, PBX1, POU4F1, NRG1	212	325	9052	2.62758	0.0127411
GOTERM_BP_FAT	GO:0042551~neuron maturation	6	2.23048	0.000238306	CDKN1C, EDNRB, ANKS1A, IRX5, CNTN2, AGRN	212	25	9052	10.2475	0.0146463
GOTERM_BP_FAT	GO:0014032~neural crest cell development	7	2.60223	0.000295748	EDNRB, SEMA5B, SEMA6C, SEMA3F, PAX3, JAG1, NRG1	212	40	9052	7.47217	0.0178181
GOTERM_BP_FAT	GO:0009954~proximal/distal pattern formation	5	1.85874	0.000320051	IRX3, IRX2, IRX1, DLL1, PBX1	212	15	9052	14.2327	0.0189275
GOTERM_BP_FAT	GO:0035295~tube development	20	7.43494	0.000334943	IRX3, RARRES2, FGFR3, PDPN, IRX2, IRX1, DLL1, JAG1, PAX3, LGR4, CITED2, DDR1, EDNRB, ID2, NDRG4, ID1, PAX7, TFAP2B, HS6ST1, PBX1	212	338	9052	2.52652	0.0194557
GOTERM_BP_FAT	GO:0051093~negative regulation of developmental process	25	9.29368	0.000355495	DCC, IRX3, COL4A2, FGFR3, RFX4, ADCY6, LMNA, DLL1, JAG1, MEIS1, VAT1, ADCYAP1, SEMA5B, EDNRB, LRP1, SEMA6C, PLK2, TRIM8, ID2, ID1, SEMA3F, CNTN2, PBX1, C1QL4, NRG1	212	483	9052	2.21005	0.0202851
GOTERM_BP_FAT	GO:0007389~pattern specification process	16	5.94796	0.000367065	IRX3, APC2, RFX4, IRX2, IRX1, DLL1, PCDH8, WLS, PAX3, CITED2, NDRG4, PAX7, SEMA3F, PBX1, NR2F2, NR2F1	212	234	9052	2.91953	0.0205872
GOTERM_BP_FAT	GO:0021516~dorsal spinal cord development	4	1.48699	0.000407818	RFX4, MDGA1, PAX7, PAX3	212	7	9052	24.3989	0.0224706
GOTERM_BP_FAT	GO:0001764~neuron migration	10	3.71747	0.000414755	DCC, OLIG3, CXCR4, MDGA1, NTRK2, CNTN2, ROBO3, NRG1, NR2F2, NR2F1	212	97	9052	4.40187	0.0224782
GOTERM_BP_FAT	GO:0006366~transcription from RNA polymerase II promoter	44	16.3569	0.000425843	FGFR3, CHCHD2, JAG1, PAX3, TAGLN3, MEIS1, ADCYAP1, CITED2, EDNRB, RGMB, OLIG3, HTRA1, PAX7, AUTS2, POU3F2, POU4F1, CDK5RAP3, AGRN, NR2F2, NRG1, DNMT3B, NR2F1, ZNF423, ENO1, DMBX1, RFX4, LMNA, DLL1, HES6, CDKN1C, SKOR1, SKOR2, DUSP26, ID2, ID1, ZMIZ2, TENM2, EBF1, TFAP2B, NHLH2, PBX1, TCF12, RERE, SMARCA4	212	1104	9052	1.70174	0.0227044
GOTERM_BP_FAT	GO:0072006~nephron development	8	2.97398	0.000507539	IRX3, IRX2, IRX1, TFAP2B, DLL1, PBX1, JAG1, LGR4	212	61	9052	5.59975	0.0257718
GOTERM_BP_FAT	GO:0021510~spinal cord development	8	2.97398	0.000507539	DCC, OLIG3, RFX4, MDGA1, PAX7, ACTL6B, DLL1, PAX3	212	61	9052	5.59975	0.0257718
GOTERM_BP_FAT	GO:0045596~negative regulation of cell differentiation	21	7.80669	0.000494713	DCC, IRX3, FGFR3, ADCY6, DLL1, JAG1, MEIS1, ADCYAP1, EDNRB, SEMA5B, LRP1, SEMA6C, TRIM8, PLK2, ID2, ID1, SEMA3F, CNTN2, PBX1, C1QL4, NRG1	212	377	9052	2.37841	0.025916
GOTERM_BP_FAT	GO:0014033~neural crest cell differentiation	7	2.60223	0.000503347	EDNRB, SEMA5B, SEMA6C, SEMA3F, PAX3, JAG1, NRG1	212	44	9052	6.79288	0.0259558
GOTERM_BP_FAT	GO:0007626~locomotory behavior	11	4.08922	0.000543251	DMBX1, SNCG, ID2, TH, CNTN2, ATP1A3, APBA2, NRG1, MEIS1, OLFM2, KLHL1	212	122	9052	3.84983	0.0271486
GOTERM_BP_FAT	GO:0007267~cell-cell signaling	27	10.0372	0.000600853	SNCG, PPFIA3, ADCY1, FGFR3, KIF5A, ADCY6, TH, BRSK2, FGF11, PCDH8, DLL1, GRIA4, WLS, VGF, LGR4, ADCYAP1, CBLN1, PLK2, P2RX3, NTRK2, CNTN2, TFAP2B, APBA2, KCNH8, AGRN, HCN3, SMPD3	212	562	9052	2.05133	0.0295437
GOTERM_BP_FAT	GO:0048592~eye morphogenesis	9	3.34572	0.000671834	IRX5, FGFR3, NTRK2, TH, TFAP2B, DLL1, JAG1, FBN2, MEIS1	212	83	9052	4.62992	0.0324998
GOTERM_BP_FAT	GO:0021953~central nervous system neuron differentiation	10	3.71747	0.000795765	DCC, CBLN1, OLIG3, MDGA1, PAX7, NTRK2, CNTN2, DCLK2, POU4F1, PAX3	212	106	9052	4.02812	0.0367893
GOTERM_BP_FAT	GO:0001654~eye development	14	5.20446	0.000793226	NES, FGFR3, IRX5, TH, DLL1, JAG1, MEIS1, CDKN1C, SMOC1, NTRK2, TFAP2B, FBN2, MAB21L2, SMARCA4	212	200	9052	2.98887	0.0371881
GOTERM_BP_FAT	GO:0043010~camera-type eye development	13	4.83271	0.000787343	NES, FGFR3, IRX5, TH, DLL1, JAG1, MEIS1, CDKN1C, NTRK2, TFAP2B, FBN2, MAB21L2, SMARCA4	212	175	9052	3.17186	0.0374423
GOTERM_BP_FAT	GO:0009790~embryo development	27	10.0372	0.000844294	IRX3, RARRES2, IRX5, IRX2, IRX1, TH, PAX3, CITED2, NDRG4, PAX7, SEMA3F, COL6A1, APBA2, HS6ST1, FBN2, NRG1, NR2F2, FN1, NES, COL4A2, DLL1, PCDH8, WLS, CDKN1C, ID2, PBX1, MAB21L2	212	575	9052	2.00495	0.0384586
GOTERM_BP_FAT	GO:0001523~retinoid metabolic process	6	2.23048	0.000914886	GPC2, RARRES2, LRP1, CRABP1, AGRN, LRP2	212	33	9052	7.76329	0.0410496
GOTERM_BP_FAT	GO:0007379~segment specification	4	1.48699	0.000945471	IRX3, IRX2, IRX1, DLL1	212	9	9052	18.9769	0.0418323
GOTERM_BP_FAT	GO:0000122~negative regulation of transcription from RNA polymerase II promoter	23	8.55019	0.00107736	DMBX1, FGFR3, HES6, PAX3, TAGLN3, CITED2, CDKN1C, EDNRB, SKOR1, SKOR2, OLIG3, DUSP26, ID2, ID1, TENM2, TFAP2B, POU4F1, NR2F2, DNMT3B, RERE, ENO1, NR2F1, SMARCA4	212	461	9052	2.13027	0.0469113
GOTERM_BP_FAT	GO:0055123~digestive system development	8	2.97398	0.00116877	CDKN1C, EDNRB, IGF1R, RARRES2, FGFR3, ID2, WLS, LGR4	212	70	9052	4.87978	0.0495053
GOTERM_CC_FAT	GO:0031226~intrinsic component of plasma membrane	32	11.8959	1.67288e-06	IGDCC3, ADCY1, FGFR3, ENPP2, ADCY6, LPAR2, JAG1, LGR4, PCDHAC1, IGF1R, EDNRB, RGMB, HS6ST1, NRG1, OLFM2, HCN3, PDPN, PTPRG, MDGA1, ATP1A3, PCDH8, DLL1, GRIA4, EPHA3, DDR1, SEMA6C, LRP1, SLC6A8, P2RX3, TENM2, NTRK2, CNTN2	176	575	8089	2.55779	0.000581994
GOTERM_CC_FAT	GO:0005887~integral component of plasma membrane	29	10.7807	1.80745e-05	IGDCC3, ADCY1, FGFR3, ENPP2, LPAR2, JAG1, LGR4, PCDHAC1, IGF1R, EDNRB, HS6ST1, NRG1, OLFM2, HCN3, PDPN, PTPRG, ATP1A3, PCDH8, DLL1, GRIA4, EPHA3, DDR1, SEMA6C, LRP1, SLC6A8, P2RX3, TENM2, NTRK2, CNTN2	176	552	8089	2.41458	0.00314005
GOTERM_CC_FAT	GO:0043005~neuron projection	29	10.7807	0.000275543	DCC, IRX3, SNCG, TH, CYTH2, L1CAM, KLHL1, ADCYAP1, POU4F1, ROBO3, UNC5C, NRG1, BOC, HCN3, TUBB3, NEFM, ANKS1A, ATP1A3, PCDH8, WLS, GRIA4, SKOR1, LRP1, PLK2, P2RX3, TENM2, NTRK2, CNTN2, BIN1	176	645	8089	2.06643	0.0158567
GOTERM_CC_FAT	GO:0030424~axon	18	6.69145	0.00026578	DCC, IRX3, SNCG, TH, ATP1A3, L1CAM, GRIA4, ADCYAP1, P2RX3, NTRK2, CNTN2, ROBO3, NRG1, BIN1, BOC, HCN3, TUBB3, NEFM	176	301	8089	2.74845	0.0183307
GOTERM_CC_FAT	GO:0098589~membrane region	28	10.4089	0.000195503	ADCY1, APC2, HIP1R, ADCY6, L1CAM, JAG1, LRRC4C, EDNRB, RGMB, NDRG4, NRG1, OLFM2, FN1, PDPN, DLL1, PCDH8, WLS, GRIA4, DDR1, CBLN1, CBLB, LRP1, P2RX3, TENM2, PRICKLE2, NTRK2, MFSD10, LRP2	176	599	8089	2.14839	0.0224253
GOTERM_CC_FAT	GO:0097458~neuron part	34	12.6394	0.000264723	DCC, IRX3, SNCG, PPFIA3, TH, CYTH2, L1CAM, ADCYAP1, KLHL1, ACTL6B, APBA2, POU4F1, ROBO3, UNC5C, NRG1, BOC, HCN3, NEFM, TUBB3, ANKS1A, ATP1A3, PCDH8, MAPK10, WLS, GRIA4, SKOR1, LRP1, PLK2, P2RX3, TENM2, NTRK2, CNTN2, BIN1, SMARCA4	176	814	8089	1.91971	0.0227707
GOTERM_CC_FAT	GO:0033267~axon part	11	4.08922	0.000703644	P2RX3, NTRK2, TH, CNTN2, L1CAM, GRIA4, NRG1, BIN1, BOC, HCN3, ADCYAP1	176	136	8089	3.71737	0.0343883
GOTERM_CC_FAT	GO:0031012~extracellular matrix	12	4.46097	0.00100816	COL4A2, GPC2, RARRES2, HTRA1, SMOC1, COL6A2, COL6A1, AGRN, FBN2, FN1, APLP1, RELL2	176	168	8089	3.28287	0.0429286
GOTERM_CC_FAT	GO:0044420~extracellular matrix component	8	2.97398	0.0013228	COL4A2, SMOC1, COL6A1, AGRN, FBN2, FN1, APLP1, RELL2	176	77	8089	4.77509	0.0498944
GOTERM_MF_FAT	GO:0038023~signaling receptor activity	19	7.0632	3.66318e-05	DCC, FGFR3, PTPRG, LPAR2, GRIA4, LGR4, EPHA3, DDR1, IGF1R, EDNRB, RGMB, CXCR4, P2RX3, NTRK2, GFRA1, KCNH8, UNC5C, NR2F2, NR2F1	195	260	8271	3.09959	0.0217755
GOTERM_MF_FAT	GO:0004872~receptor activity	22	8.17844	8.6395e-05	DCC, FGFR3, ENPP2, PTPRG, LPAR2, HSPA1A, GRIA4, LGR4, EPHA3, DDR1, IGF1R, EDNRB, RGMB, LRP1, CXCR4, P2RX3, NTRK2, GFRA1, KCNH8, UNC5C, NR2F2, NR2F1	195	356	8271	2.62118	0.0256287
GOTERM_MF_FAT	GO:0060089~molecular transducer activity	27	10.0372	0.000385432	DCC, FGFR3, PTPRG, ENPP2, HSPA1A, LPAR2, GRIA4, WLS, MAPK10, LGR4, ADCYAP1, EPHA3, DDR1, EDNRB, IGF1R, RGMB, CBLB, LRP1, PLK2, CXCR4, P2RX3, NTRK2, GFRA1, KCNH8, UNC5C, NR2F2, NR2F1	195	544	8271	2.10518	0.0452807

## Sheet: canonical pathways
up regulated DEGs
Ingenuity Canonical Pathways	-log(B-H p-value)	Ratio	z-score	Molecules
Wnt/β-catenin Signaling	3.04	0.071	-0.577	SOX2,FZD8,TCF4,WNT7A,SOX6,ACVR1,LEF1,SOX8,SOX9,SFRP1,WNT5B,SOX5
Factors Promoting Cardiogenesis in Vertebrates	2.44	0.087	#NUM!	FZD8,TCF4,ACVR1,LEF1,MEF2C,NPPA,PRKD1,PRKCB
Axonal Guidance Signaling	2.44	0.0402	#NUM!	EPHA7,PAPPA2,NRP2,ADAMTS9,PDGFC,PLXND1,EFNB2,FZD8,SEMA3A,RRAS2,ADAMTS6,WNT7A,EFNB1,PLCB1,ROBO2,WNT5B,PRKD1,PRKCB
Role of Macrophages, Fibroblasts and Endothelial Cells in Rheumatoid Arthritis	2.23	0.0453	#NUM!	TCF4,VCAM1,CREB5,PDGFC,IL33,FZD8,WNT7A,RRAS2,PLCB1,LEF1,SFRP1,WNT5B,PRKD1,PRKCB
Human Embryonic Stem Cell Pluripotency	2.09	0.0629	#NUM!	SOX2,FZD8,TCF4,WNT7A,ACVR1,S1PR1,LEF1,PDGFC,WNT5B
Regulation of the Epithelial-Mesenchymal Transition Pathway	1.34	0.0476	#NUM!	FZD8,NOTCH2,TCF4,WNT7A,RRAS2,APH1B,LEF1,WNT5B,HMGA2
NF-κB Activation by Viruses	1.34	0.0698	2.449	RRAS2,ITGAV,ITGA6,EIF2AK2,PRKD1,PRKCB
down regulated DEGs
Ingenuity Canonical Pathways	-log(B-H p-value)	Ratio	z-score	Molecules
Axonal Guidance Signaling	3.14	0.0424	NaN	TUBB3,LRRC4C,PLXNA3,MYL6,KALRN,EPHB2,CXCR4,L1CAM,EPHA3,TUBB,ROBO3,SEMA6C,FGFR3,SRGAP3,NTRK2,TUBA1A,DCC,SEMA3F,UNC5C
